# Supplementary material for: Structure elucidation and construction of isomerisation pathways in small to moderate-sized (6–27) MgO nanoclusters: an adaptive mutation simulated annealing based analysis with quantum chemical calculations
Source: Royal Society of Chemistry journal article supplement (doi:10.1039/c9cp06947j), 2020-01-01
Supplement: c9cp06947j1.pdf [file c9cp06947j1.pdf]

## Supplementary Information

### Structure elucidation and construction of isomerisation pathways in small to moderate-sized (6 — 27) MgO nanoclusters: An Adaptive Mutation Simulated Annealing based analysis with quantum chemical calculations

Kuntal Ghosh\*, Rahul Sharma<sup>†</sup>, Pinaki Chaudhury <sup>‡</sup>

| <b>Adaptive Mutation Simulated Annealing<br/>(ASA)</b>                        | <b>Simulated Annealing<br/>(SA)</b>                                            |
|-------------------------------------------------------------------------------|--------------------------------------------------------------------------------|
| (i) Much higher chances of obtaining the global minimum in one single run     | (i) Lower chances of obtaining the global minimum in one single run            |
| (ii) Global minimum reached in lesser no of temperature steps (1)             | (ii) Minima (local or global) reached in more no of temperature steps (1)      |
| (iii) The optimisation parameters are automatically updated (hence, adaptive) | (iii) The optimisation parameters must be manually updated (if updated at all) |

Table 1: Comparison of ASA and SA algorithms

\*Department of Chemistry, St. Xavier's College, 30 Mother Teresa Sarani. Kolkata - 700016, India, email: kuntal-ghoshchem@gmail.com, Present Address: Department of Chemistry, Indian Institute of Technology Kanpur, Kanpur - 208016, India

<sup>†</sup>ORCID: 0000-0003-2999-1285, email: sharmamonty@gmail.com: Corresponding author, Department of Chemistry, St. Xavier's College, 30 Mother Teresa Sarani. Kolkata - 700016, India

<sup>‡</sup>ORCID: 0000-0002-5192-7338, email: pinakc@rediffmail.com: Corresponding author, Department of Chemistry, University of Calcutta, Kolkata - 700009, India

| $P_c$       | Energy (in kJ/mol) | Gradient norm            | First eigenvalue         | Second eigenvalue       |
|-------------|--------------------|--------------------------|--------------------------|-------------------------|
| 0.0 (R)     | -5795.6716         | $1.2511 \times 10^{-9}$  | $8.7912 \times 10^{-4}$  | $2.5349 \times 10^{-3}$ |
| 0.1021      | -5795.5369         | $5.1269 \times 10^{-7}$  | $4.8667 \times 10^{-4}$  | $2.8009 \times 10^{-3}$ |
| 0.2042      | -5795.2336         | $1.0665 \times 10^{-6}$  | $1.3886 \times 10^{-5}$  | $3.0061 \times 10^{-3}$ |
| 0.3063      | -5794.9576         | $4.0469 \times 10^{-7}$  | $-5.9872 \times 10^{-4}$ | $2.7939 \times 10^{-3}$ |
| 0.3799 (TS) | -5794.8946         | $5.0278 \times 10^{-10}$ | $-1.1061 \times 10^{-3}$ | $2.5692 \times 10^{-3}$ |
| 0.5107      | -5795.4000         | $6.1260 \times 10^{-7}$  | $-1.9736 \times 10^{-3}$ | $2.0788 \times 10^{-3}$ |
| 0.7148      | -5799.1651         | $6.8466 \times 10^{-6}$  | $-2.3967 \times 10^{-3}$ | $1.7682 \times 10^{-3}$ |
| 0.9216      | -5806.7956         | $7.3158 \times 10^{-6}$  | $3.5987 \times 10^{-3}$  | $4.1677 \times 10^{-3}$ |
| 0.9739      | -5807.9061         | $8.9920 \times 10^{-7}$  | $3.5599 \times 10^{-3}$  | $4.1849 \times 10^{-3}$ |
| 1.0 (P)     | -5807.9596         | $2.2071 \times 10^{-7}$  | $3.5637 \times 10^{-3}$  | $4.1435 \times 10^{-3}$ |

Table 2: Energy, gradient norm and first two eigenvalues of  $(MgO)_8$  cluster at each  $P_c$

| $P_c$       | Energy (in kJ/mol) | Gradient norm            | First eigenvalue         | Second eigenvalue       |
|-------------|--------------------|--------------------------|--------------------------|-------------------------|
| 0.0 (R)     | -6577.9406         | $1.0360 \times 10^{-9}$  | $1.5870 \times 10^{-3}$  | $1.5874 \times 10^{-3}$ |
| 0.1         | -6577.2765         | $6.1838 \times 10^{-6}$  | $1.2559 \times 10^{-3}$  | $1.9551 \times 10^{-3}$ |
| 0.2         | -6575.6834         | $1.1589 \times 10^{-5}$  | $8.0425 \times 10^{-4}$  | $2.2817 \times 10^{-3}$ |
| 0.3         | -6573.3286         | $2.3571 \times 10^{-5}$  | $2.8989 \times 10^{-4}$  | $2.5225 \times 10^{-3}$ |
| 0.55        | -6567.3134         | $1.3558 \times 10^{-5}$  | $-1.3569 \times 10^{-3}$ | $5.3591 \times 10^{-4}$ |
| 0.6495 (TS) | -6566.5729         | $6.3011 \times 10^{-10}$ | $-2.0892 \times 10^{-3}$ | $4.7841 \times 10^{-5}$ |
| 0.8         | -6569.1573         | $7.6358 \times 10^{-6}$  | $-1.9831 \times 10^{-3}$ | $1.0565 \times 10^{-3}$ |
| 0.9         | -6573.5535         | $1.6779 \times 10^{-5}$  | $9.5932 \times 10^{-4}$  | $3.1314 \times 10^{-3}$ |
| 1.0 (P)     | -6576.3115         | $1.9702 \times 10^{-6}$  | $4.3135 \times 10^{-3}$  | $5.2629 \times 10^{-3}$ |

Table 3: Energy, gradient norm and first two eigenvalues of  $(MgO)_9$  cluster at each  $P_c$

| $P_c$       | Energy (in kJ/mol) | Gradient norm           | First eigenvalue         | Second eigenvalue       |
|-------------|--------------------|-------------------------|--------------------------|-------------------------|
| 0.0 (R)     | -8049.5664         | $1.7177 \times 10^{-9}$ | $1.1007 \times 10^{-3}$  | $1.7565 \times 10^{-3}$ |
| 0.1071      | -8049.1677         | $6.9929 \times 10^{-7}$ | $1.0182 \times 10^{-3}$  | $1.7307 \times 10^{-3}$ |
| 0.2142      | -8047.9812         | $5.7995 \times 10^{-6}$ | $8.2655 \times 10^{-4}$  | $1.6954 \times 10^{-3}$ |
| 0.3213      | -8046.0958         | $1.4647 \times 10^{-5}$ | $4.9914 \times 10^{-4}$  | $1.6191 \times 10^{-3}$ |
| 0.4284      | -8043.9179         | $2.5397 \times 10^{-5}$ | $-3.5674 \times 10^{-5}$ | $1.4876 \times 10^{-3}$ |
| 0.6977      | -8040.0629         | $4.0953 \times 10^{-6}$ | $-1.4421 \times 10^{-3}$ | $9.6673 \times 10^{-4}$ |
| 0.7543 (TS) | -8039.8630         | $8.3168 \times 10^{-9}$ | $-1.5580 \times 10^{-3}$ | $9.1738 \times 10^{-4}$ |
| 0.8613      | -8040.2347         | $1.8124 \times 10^{-6}$ | $-8.7926 \times 10^{-4}$ | $1.1763 \times 10^{-3}$ |
| 0.9712      | -8041.2356         | $1.8483 \times 10^{-6}$ | $1.5488 \times 10^{-3}$  | $1.8425 \times 10^{-3}$ |
| 1.0 (P)     | -8041.3757         | $1.7230 \times 10^{-7}$ | $1.6318 \times 10^{-3}$  | $2.5959 \times 10^{-3}$ |

Table 4: Energy, gradient norm and first two eigenvalues of  $(MgO)_{11}$  cluster at each  $P_c$

| $P_c$       | Energy (in kJ/mol) | Gradient norm            | First eigenvalue         | Second eigenvalue       |
|-------------|--------------------|--------------------------|--------------------------|-------------------------|
| 0.0 (R)     | -8843.1849         | $8.9789 \times 10^{-12}$ | $1.3134 \times 10^{-3}$  | $1.3142 \times 10^{-3}$ |
| 0.1         | -8842.4170         | $8.8218 \times 10^{-6}$  | $1.0348 \times 10^{-3}$  | $1.6113 \times 10^{-3}$ |
| 0.2         | -8840.4386         | $1.2585 \times 10^{-5}$  | $7.0335 \times 10^{-4}$  | $1.9131 \times 10^{-3}$ |
| 0.3         | -8837.7605         | $9.2312 \times 10^{-6}$  | $2.5415 \times 10^{-4}$  | $1.5471 \times 10^{-3}$ |
| 0.45        | -8833.1295         | $6.5741 \times 10^{-6}$  | $-7.9413 \times 10^{-4}$ | $4.2414 \times 10^{-4}$ |
| 0.5520 (TS) | -8831.5159         | $3.0247 \times 10^{-7}$  | $-1.6035 \times 10^{-3}$ | $1.2870 \times 10^{-4}$ |
| 0.75        | -8835.6575         | $5.6468 \times 10^{-6}$  | $-5.5730 \times 10^{-4}$ | $2.8114 \times 10^{-3}$ |
| 0.8         | -8836.4228         | $1.8454 \times 10^{-5}$  | $-1.3066 \times 10^{-3}$ | $2.6651 \times 10^{-3}$ |
| 0.9         | -8841.1137         | $5.5170 \times 10^{-5}$  | $2.6742 \times 10^{-3}$  | $2.9395 \times 10^{-3}$ |
| 1.0 (P)     | -8844.2078         | $9.1753 \times 10^{-7}$  | $2.5801 \times 10^{-3}$  | $3.0105 \times 10^{-3}$ |

Table 5: Energy, gradient norm and first two eigenvalues of  $(MgO)_{12}$  cluster at each  $P_c$

| $P_c$       | Energy (in kJ/mol) | Gradient norm           | First eigenvalue         | Second eigenvalue       |
|-------------|--------------------|-------------------------|--------------------------|-------------------------|
| 0.0 (R)     | -10317.1226        | $1.8850 \times 10^{-9}$ | $8.7342 \times 10^{-4}$  | $1.3281 \times 10^{-3}$ |
| 0.1043      | -10316.7704        | $2.4056 \times 10^{-6}$ | $8.8193 \times 10^{-4}$  | $1.3439 \times 10^{-3}$ |
| 0.2086      | -10315.6712        | $1.0302 \times 10^{-5}$ | $7.8061 \times 10^{-4}$  | $1.3308 \times 10^{-3}$ |
| 0.3127      | -10313.8867        | $2.0797 \times 10^{-5}$ | $5.5614 \times 10^{-4}$  | $1.2876 \times 10^{-3}$ |
| 0.4170      | -10311.6423        | $2.8199 \times 10^{-5}$ | $1.5774 \times 10^{-4}$  | $1.2093 \times 10^{-3}$ |
| 0.5215      | -10309.4264        | $2.8818 \times 10^{-5}$ | $-4.3953 \times 10^{-4}$ | $1.0892 \times 10^{-3}$ |
| 0.6266      | -10307.8823        | $2.2566 \times 10^{-5}$ | $-1.1062 \times 10^{-3}$ | $9.1608 \times 10^{-4}$ |
| 0.7317      | -10307.1259        | $1.8918 \times 10^{-6}$ | $-1.5260 \times 10^{-3}$ | $7.7956 \times 10^{-4}$ |
| 0.7847 (TS) | -10307.1188        | $2.0472 \times 10^{-8}$ | $-1.4970 \times 10^{-3}$ | $7.8735 \times 10^{-4}$ |
| 0.8382      | -10307.4083        | $1.6159 \times 10^{-6}$ | $-1.0209 \times 10^{-3}$ | $9.2157 \times 10^{-4}$ |
| 0.9461      | -10308.5166        | $1.5010 \times 10^{-6}$ | $1.1657 \times 10^{-3}$  | $1.6175 \times 10^{-3}$ |
| 1.0 (P)     | -10308.7138        | $2.5984 \times 10^{-7}$ | $1.1965 \times 10^{-3}$  | $1.9204 \times 10^{-3}$ |

Table 6: Energy, gradient norm and first two eigenvalues of  $(MgO)_{14}$  cluster at each  $P_c$

| $P_c$      | Energy (in kJ/mol) | Gradient norm            | First eigenvalue         | Second eigenvalue       |
|------------|--------------------|--------------------------|--------------------------|-------------------------|
| 0.0 (R)    | -15654.1949        | $3.7872 \times 10^{-8}$  | $6.0922 \times 10^{-4}$  | $1.2554 \times 10^{-3}$ |
| 0.1        | -15653.7107        | $2.4779 \times 10^{-6}$  | $5.1056 \times 10^{-4}$  | $1.2185 \times 10^{-3}$ |
| 0.2        | -15652.5152        | $8.5372 \times 10^{-6}$  | $3.8623 \times 10^{-4}$  | $1.1701 \times 10^{-3}$ |
| 0.3        | -15650.7523        | $2.4936 \times 10^{-5}$  | $1.9622 \times 10^{-4}$  | $1.0884 \times 10^{-3}$ |
| 0.4        | -15649.0147        | $3.2064 \times 10^{-5}$  | $-1.0226 \times 10^{-4}$ | $9.3387 \times 10^{-4}$ |
| 0.5        | -15647.8865        | $1.7381 \times 10^{-5}$  | $-5.4406 \times 10^{-4}$ | $6.6105 \times 10^{-4}$ |
| 0.55       | -15647.7323        | $3.4248 \times 10^{-6}$  | $-8.1620 \times 10^{-4}$ | $4.8561 \times 10^{-4}$ |
| 0.6002(TS) | -15647.6623        | $5.4342 \times 10^{-10}$ | $-1.0957 \times 10^{-3}$ | $3.0012 \times 10^{-4}$ |
| 0.65       | -15647.7979        | $3.3368 \times 10^{-7}$  | $-1.2620 \times 10^{-3}$ | $1.7969 \times 10^{-4}$ |
| 0.7        | -15648.2771        | $1.4248 \times 10^{-6}$  | $-1.3194 \times 10^{-3}$ | $1.2987 \times 10^{-4}$ |
| 0.8        | -15650.3362        | $6.6709 \times 10^{-6}$  | $-6.9023 \times 10^{-4}$ | $6.0244 \times 10^{-4}$ |
| 0.9        | -15652.8319        | $3.3826 \times 10^{-5}$  | $1.2802 \times 10^{-3}$  | $1.6611 \times 10^{-3}$ |
| 1.0 (P)    | -15654.3813        | $1.4482 \times 10^{-8}$  | $1.2878 \times 10^{-3}$  | $1.7772 \times 10^{-3}$ |

Table 7: Energy, gradient norm and first two eigenvalues of  $(MgO)_{21}$  cluster at each  $P_c$

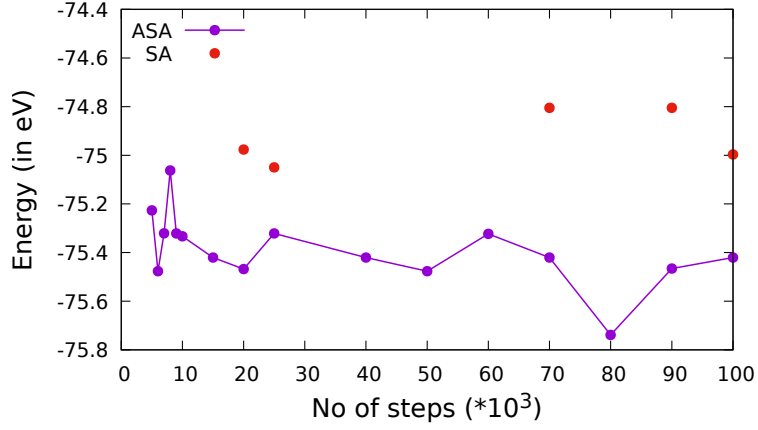

Figure 1: Comparison of SA and ASA for  $(MgO)_{10}$  cluster. For a few step counts, no valid SA structure corresponding to an ASA structure was found. Furthermore, ASA yielded the global minimum at step count = 80000. This clearly shows that ASA is the superior algorithm.

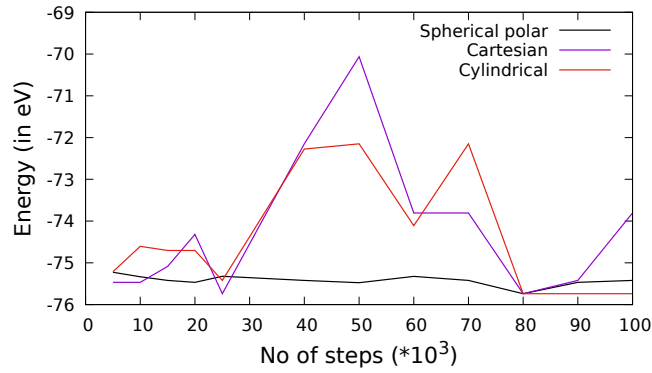

(a)  $(MgO)_{10}$

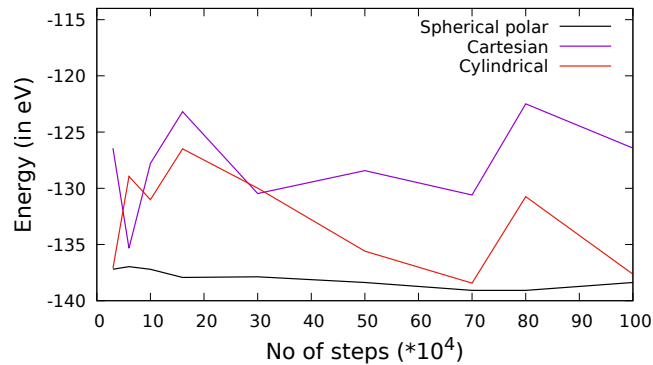

(b)  $(MgO)_{18}$

Figure 2: Comparison of the performance of the ASA algorithm using three different coordinate systems. While the cartesian and cylindrical coordinate systems follow an uneven, irregular trend, the spherical coordinate system consistently yields low energy structures. Clearly, the spherical coordinate system is the best choice to not only locate the global minimum for a particular cluster, but also stable local minima. For this comparison, ASA was used throughout.



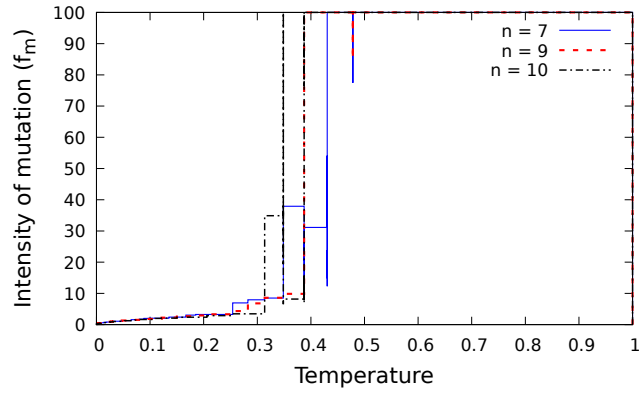

(a)

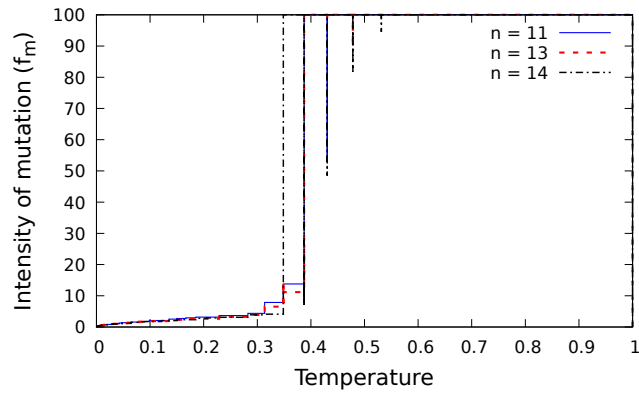

(b)

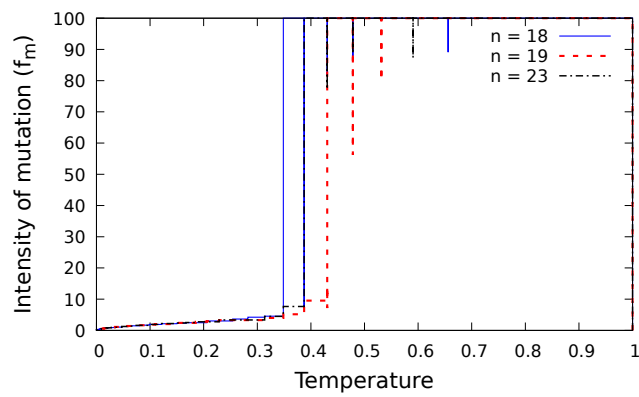

(c)

Figure 3: Variation of intensity of mutation  $f_m$  with temperature for a few extra sizes

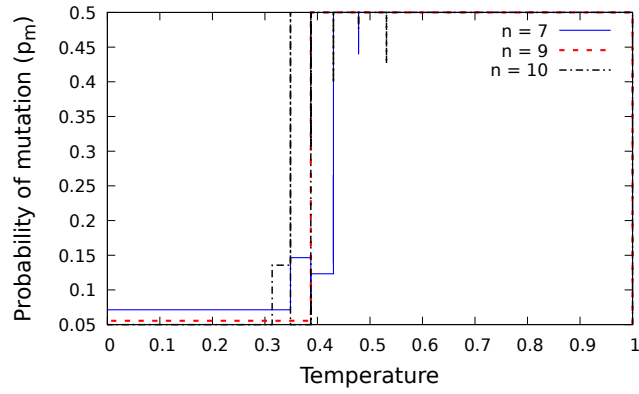

(a)

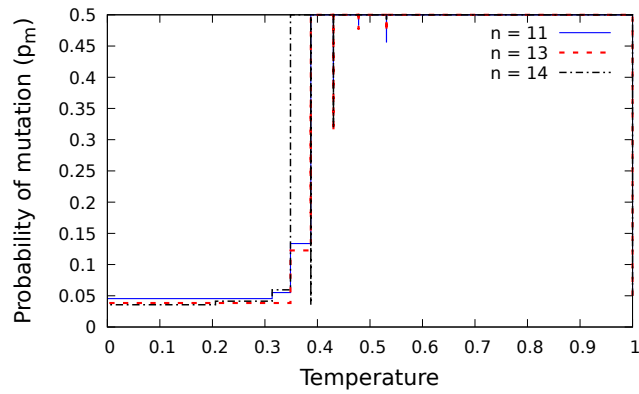

(b)

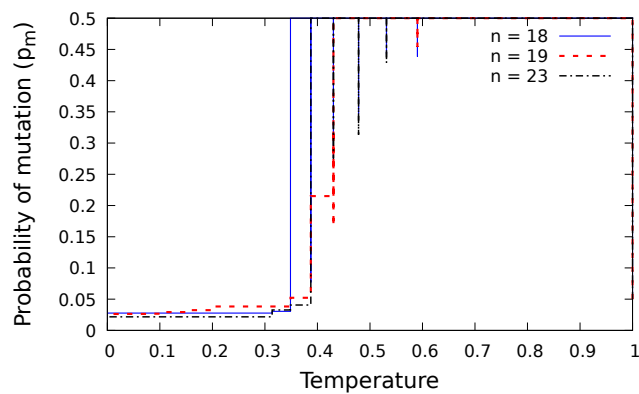

(c)

Figure 4: Variation of probability of mutation  $p_m$  with temperature for a few extra sizes

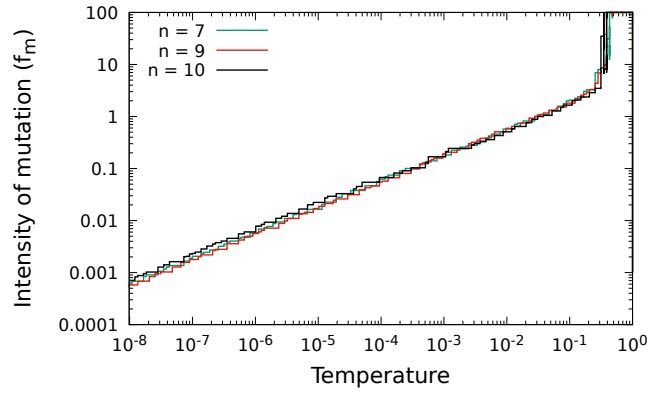

(a)

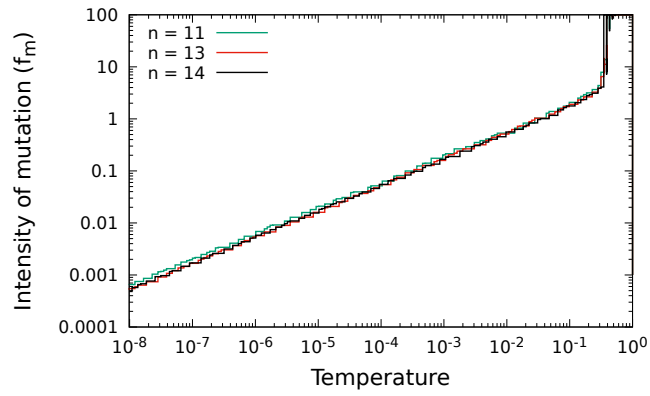

(b)

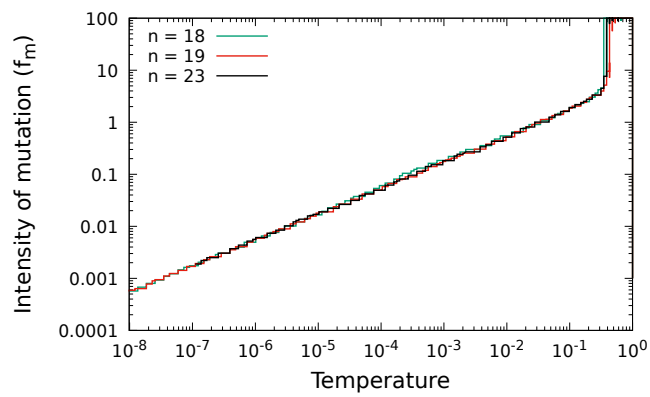

(c)

Figure 5: Variation of  $f_m$  in the logarithmic scale so as to clearly depict the changes at low ranges

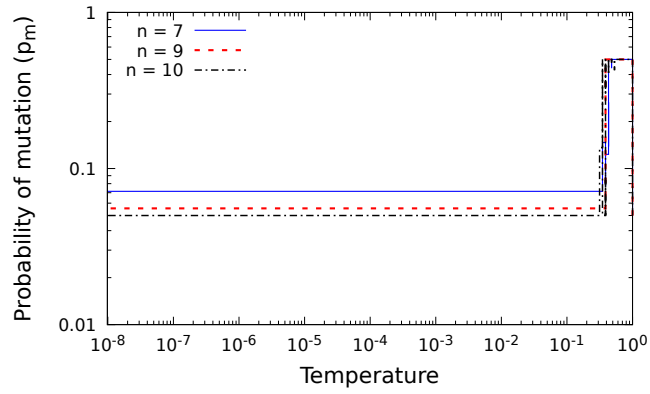

(a)

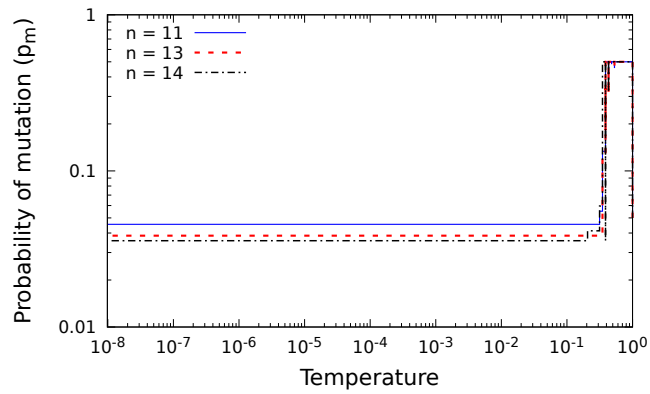

(b)

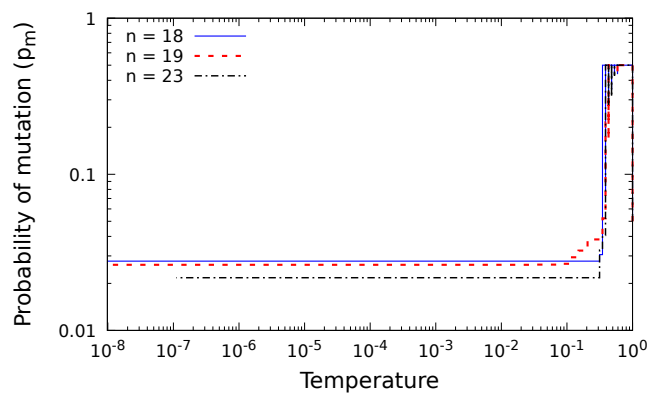

(c)

Figure 6: Variation of  $p_m$  in the logarithmic scale so as to clearly depict the changes at low ranges

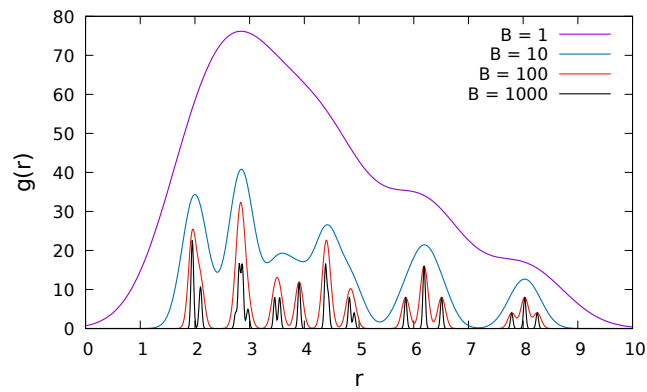

(a)  $(MgO)_{10}$

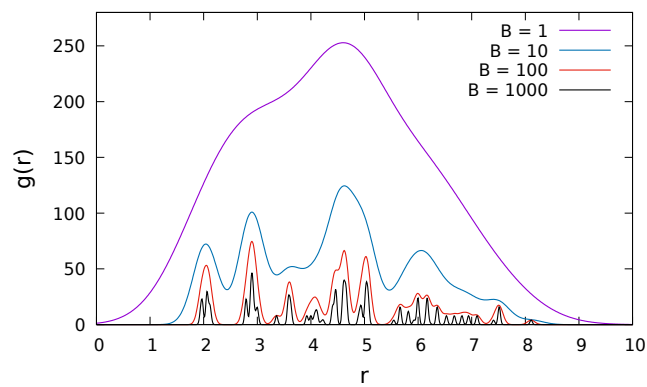

(b)  $(MgO)_{18}$

Figure 7: Variation in the Radial Distribution Function (RDF) with the value of the soothing parameter, B for two sizes

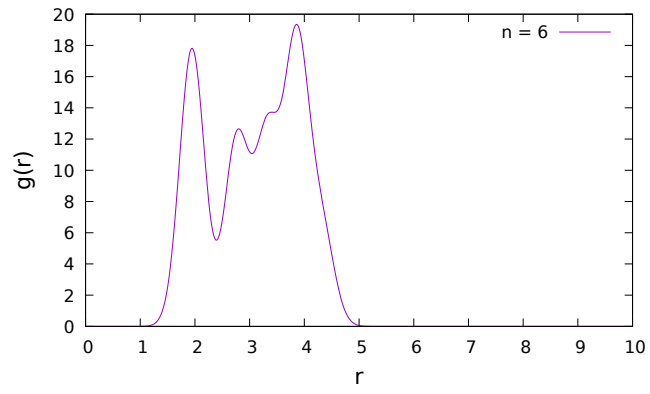

(a)  $(MgO)_6$

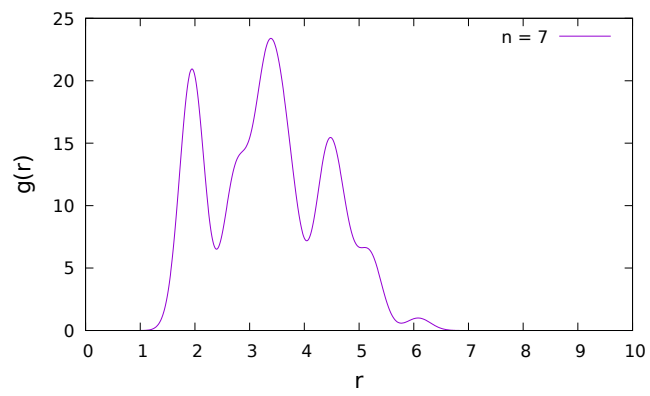

(b)  $(MgO)_7$

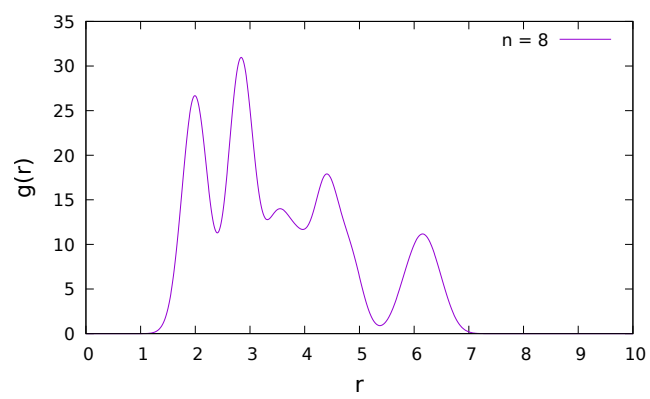

(c)  $(MgO)_8$

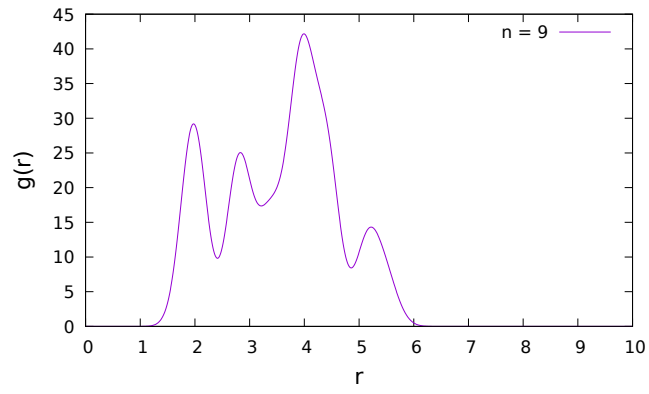

(d)  $(MgO)_9$

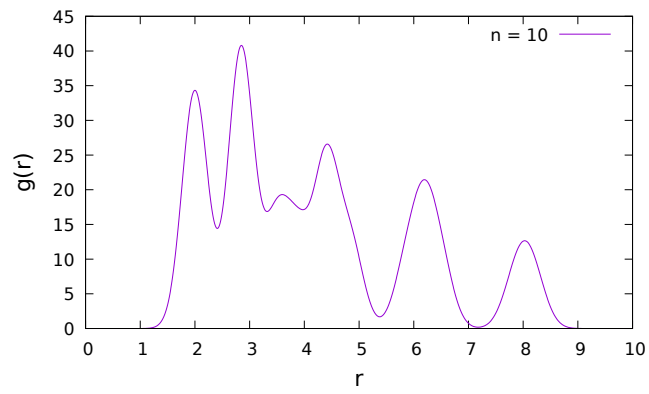

(e)  $(MgO)_{10}$

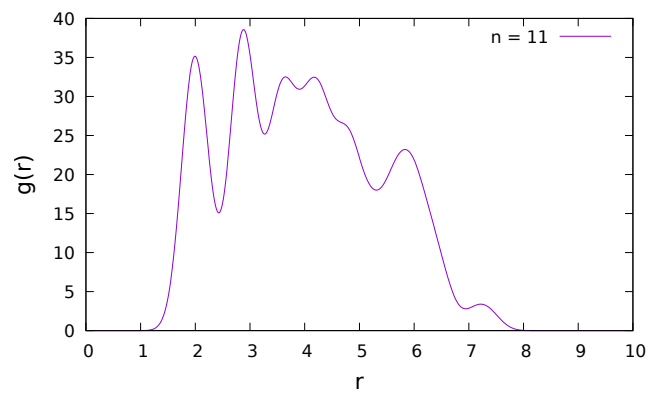

(f)  $(MgO)_{11}$

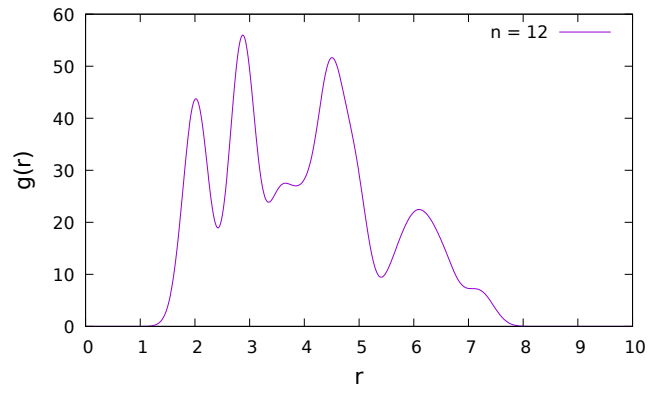

(g)  $(MgO)_{12}$

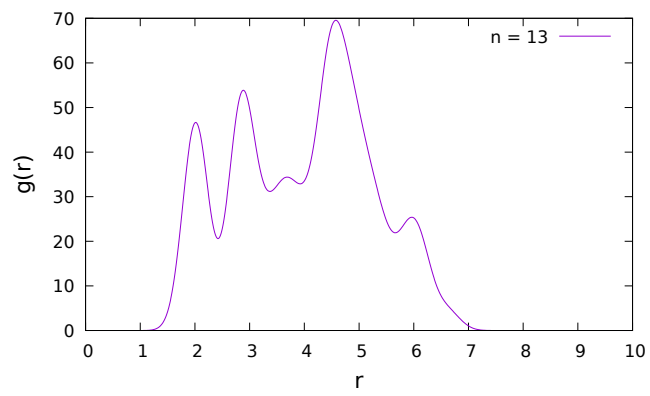

(h)  $(MgO)_{13}$

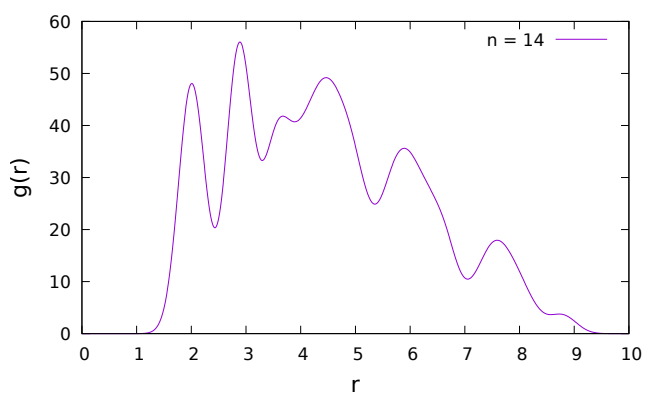

(i)  $(MgO)_{14}$



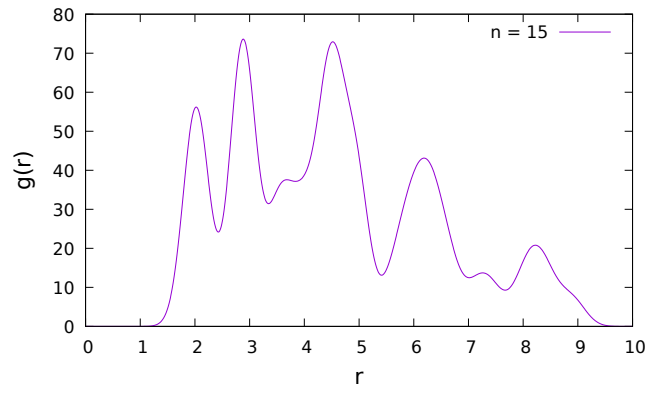

(j)  $(MgO)_{15}$

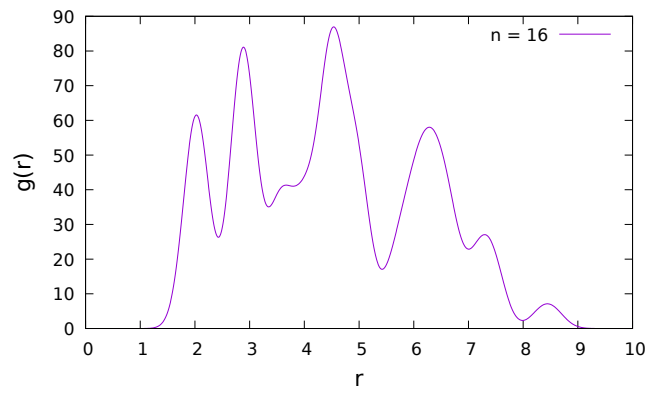

(k)  $(MgO)_{16}$

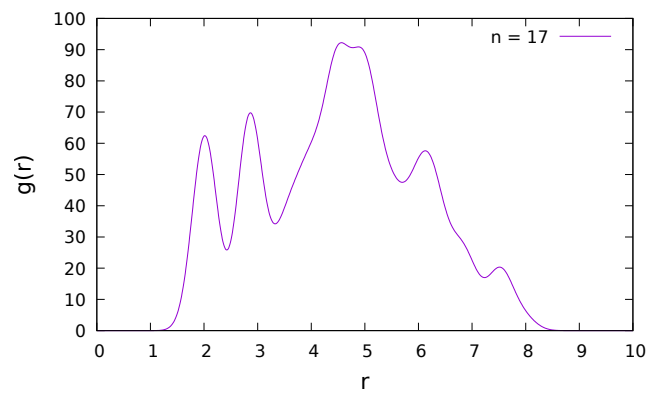

(l)  $(MgO)_{17}$

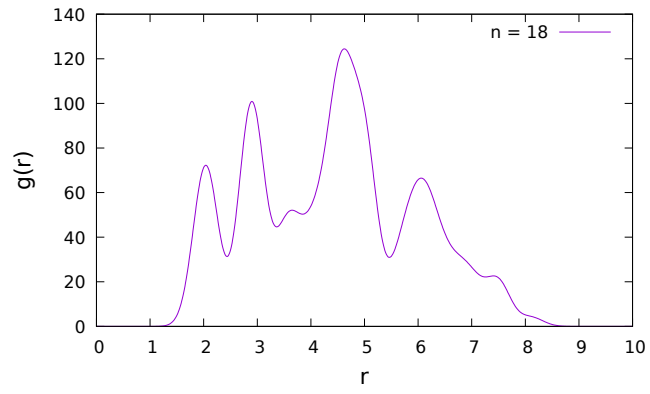

(m)  $(MgO)_{18}$

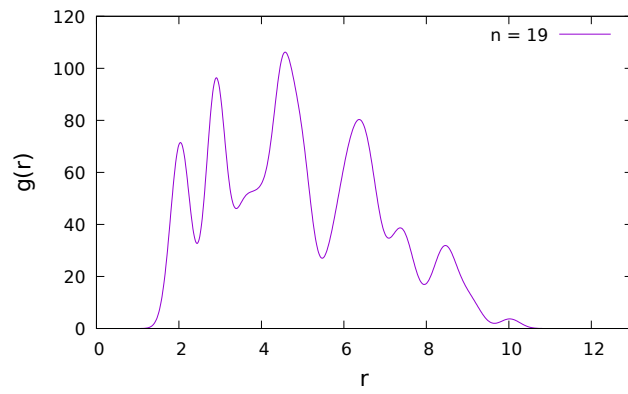

(n)  $(MgO)_{19}$

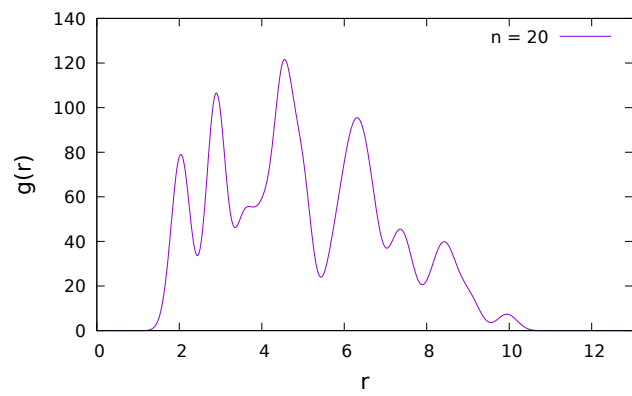

(o)  $(MgO)_{20}$

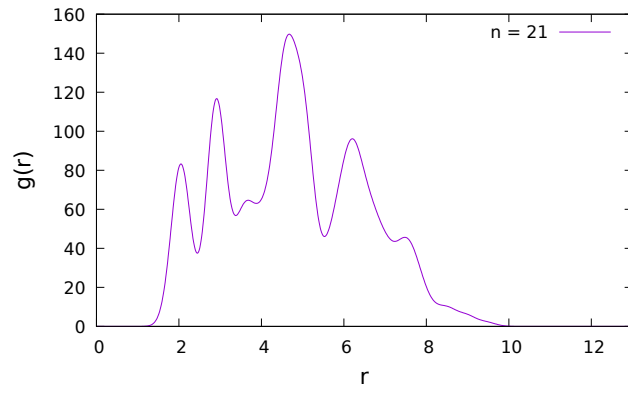

(p)  $(MgO)_{21}$

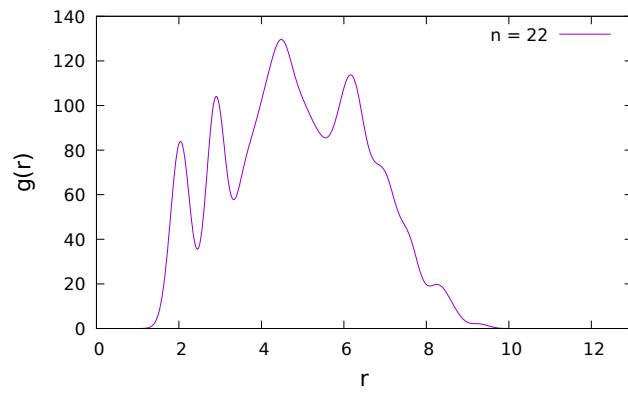

(q)  $(MgO)_{22}$

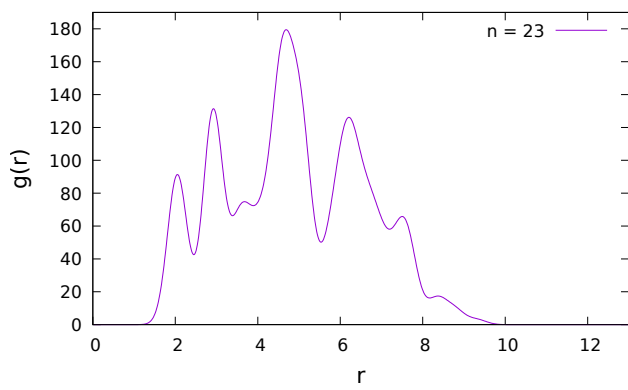

(r)  $(MgO)_{23}$

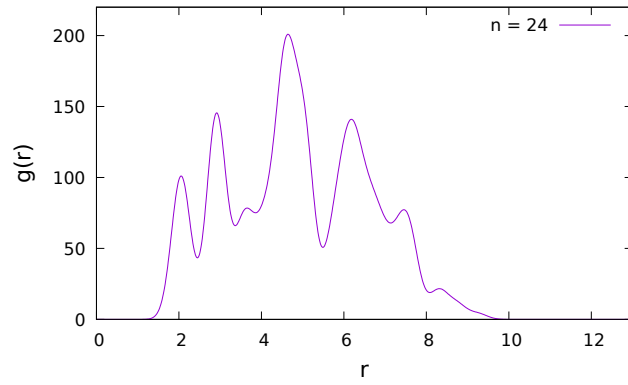

(s)  $(MgO)_{24}$

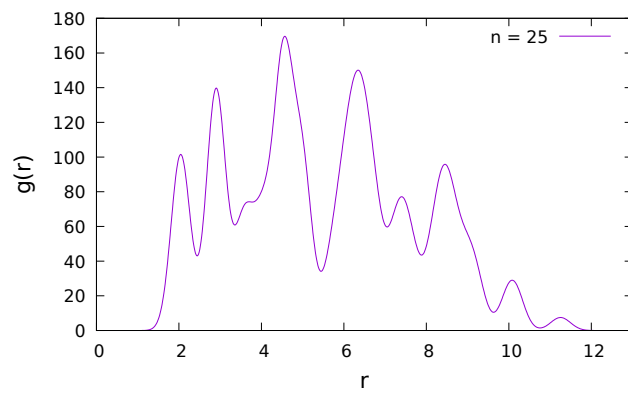

(t)  $(MgO)_{25}$

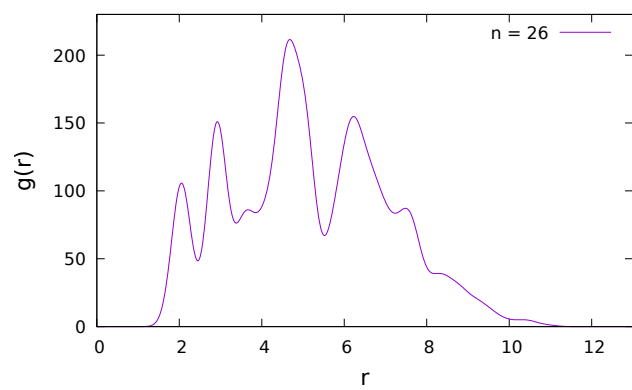

(u)  $(MgO)_{26}$

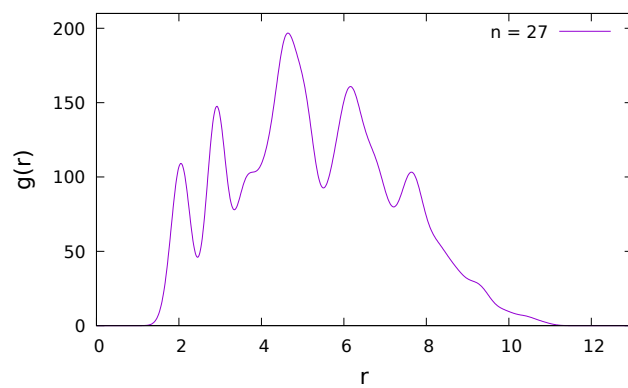

(v)  $(MgO)_{27}$

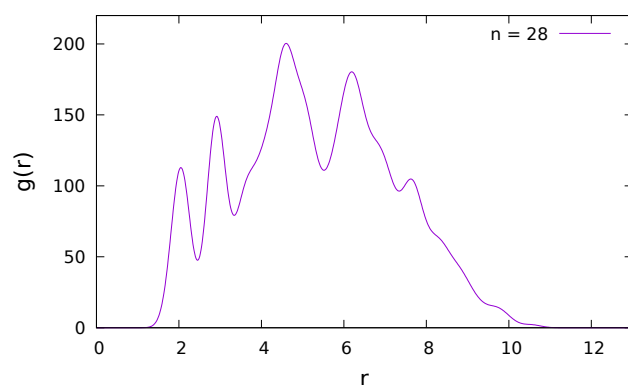

(w)  $(MgO)_{28}$

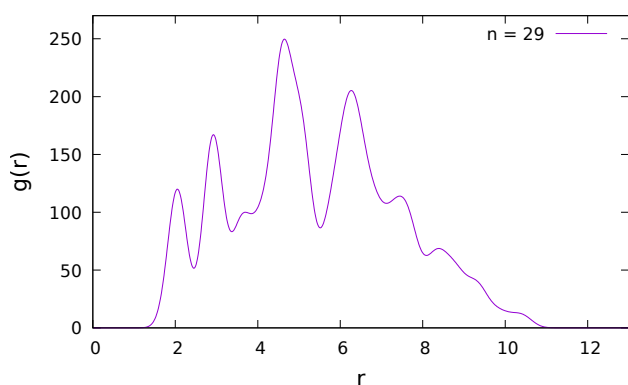

(x)  $(MgO)_{29}$

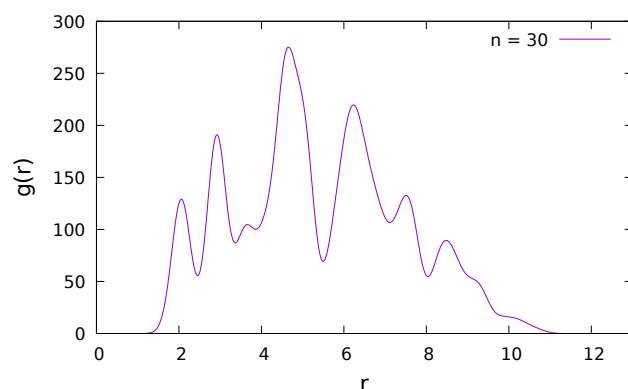

(y)  $(MgO)_{30}$

Figure 8: Radial Distribution Functions (RDF) for all the global structures as generated by the ASA algorithm using the Born-Mayer potential

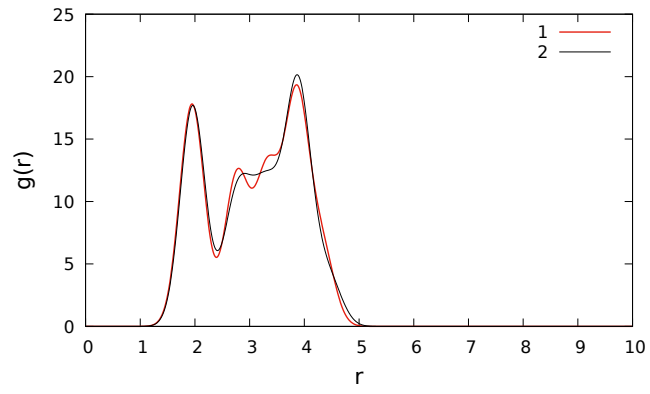

(a)  $(MgO)_6$

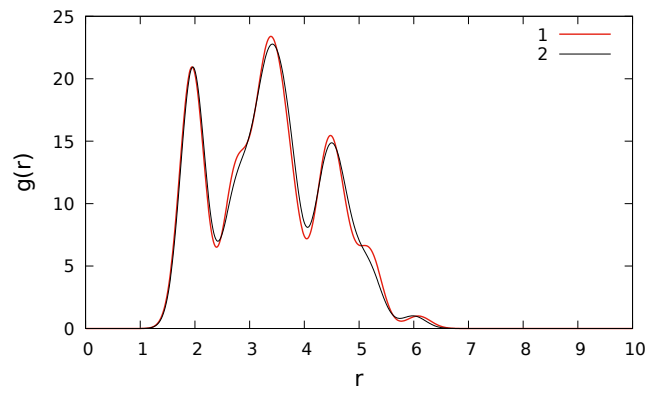

(b)  $(MgO)_7$

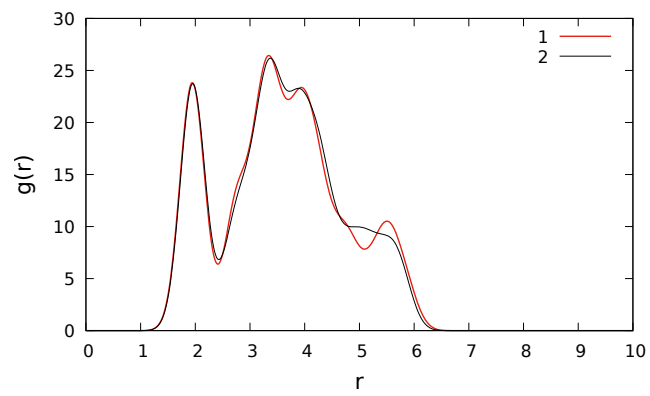

(c)  $(MgO)_8$  (Local)

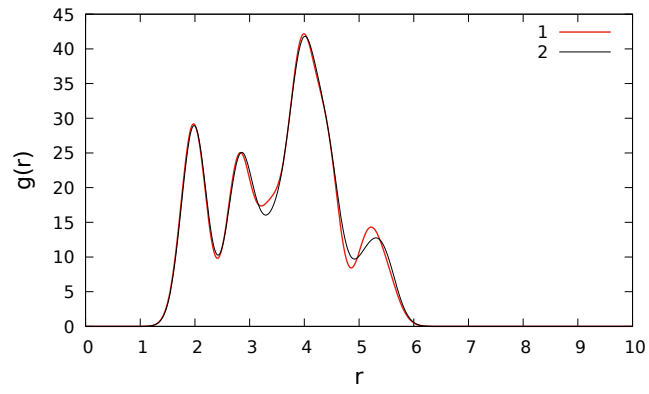

(d)  $(MgO)_9$

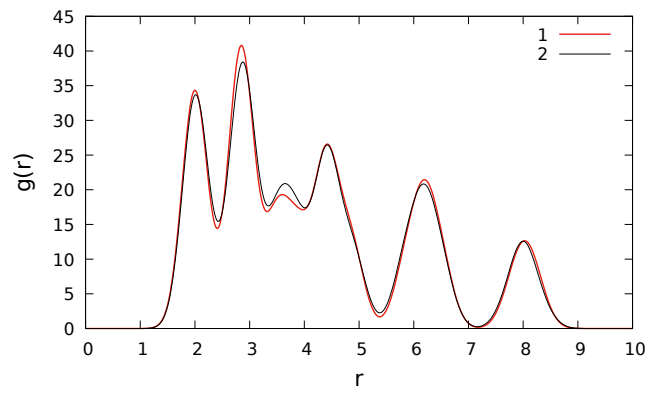

(e)  $(MgO)_{10}$

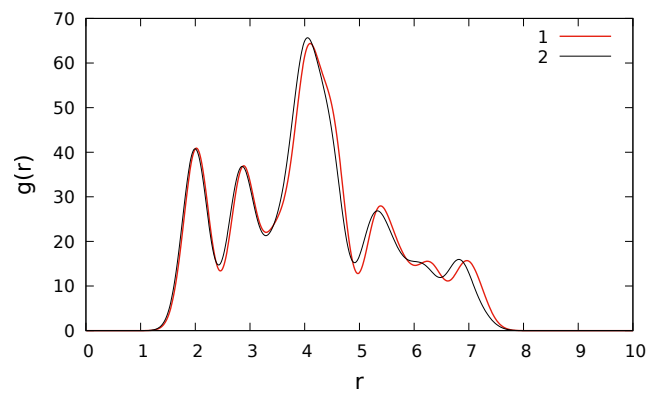

(f)  $(MgO)_{12}$  (Local)

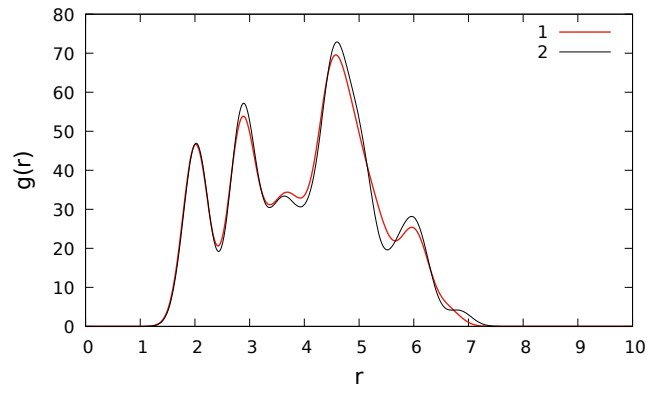

(g)  $(MgO)_{13}$

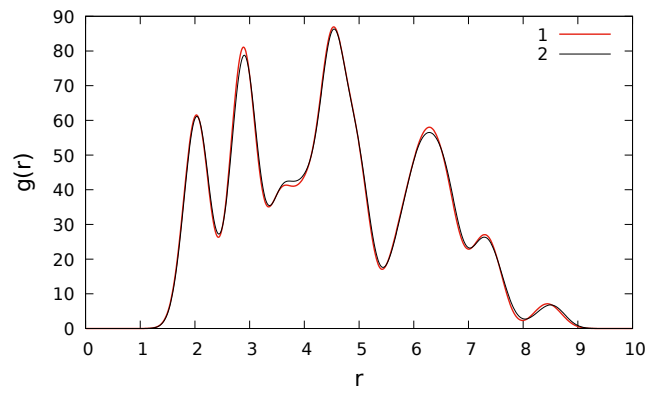

(h)  $(MgO)_{16}$

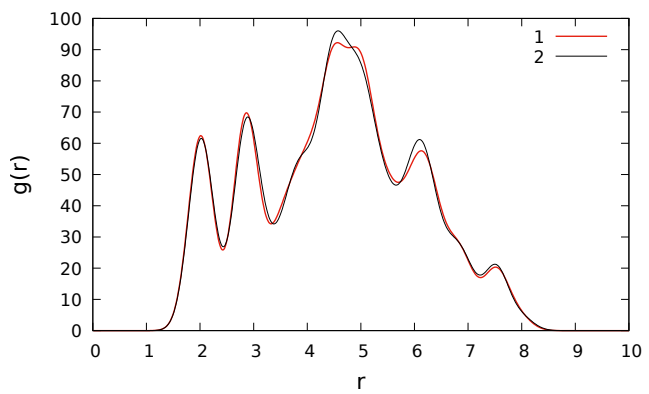

(i)  $(MgO)_{17}$



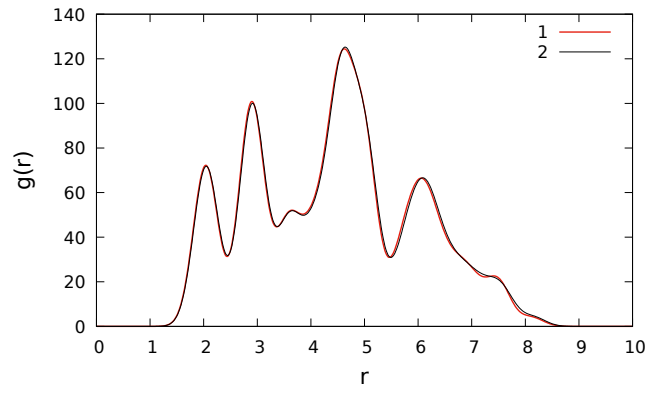

(j)  $(MgO)_{18}$

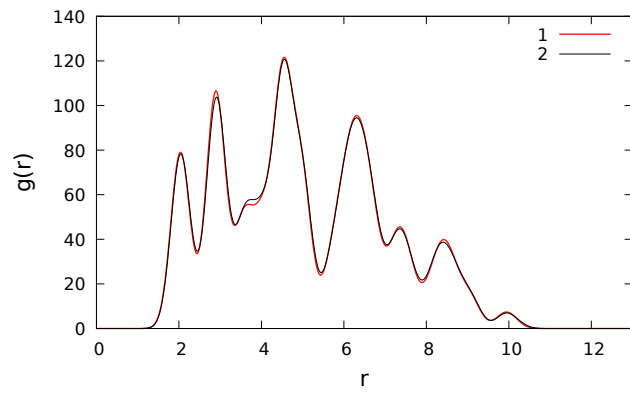

(k)  $(MgO)_{20}$

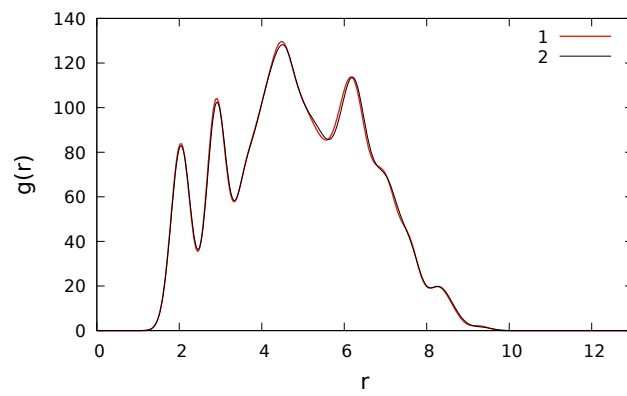

(l)  $(MgO)_{22}$

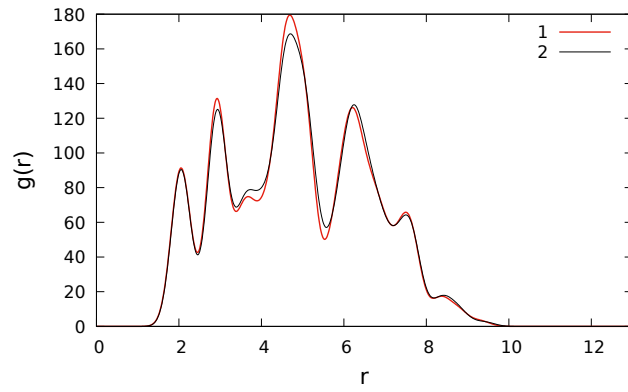

(m)  $(MgO)_{23}$

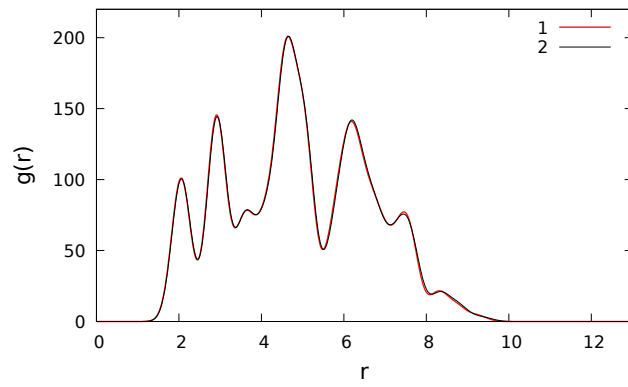

(n)  $(MgO)_{24}$

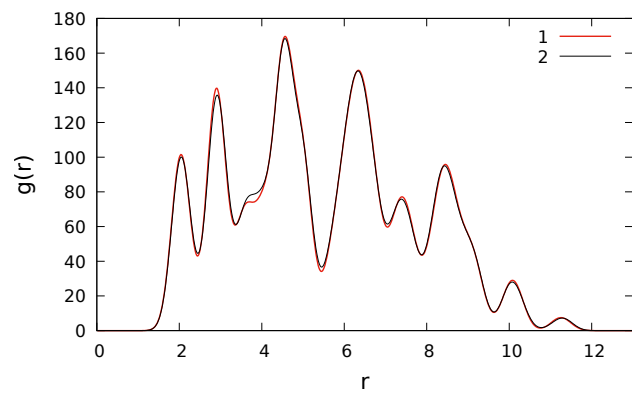

(o)  $(MgO)_{25}$

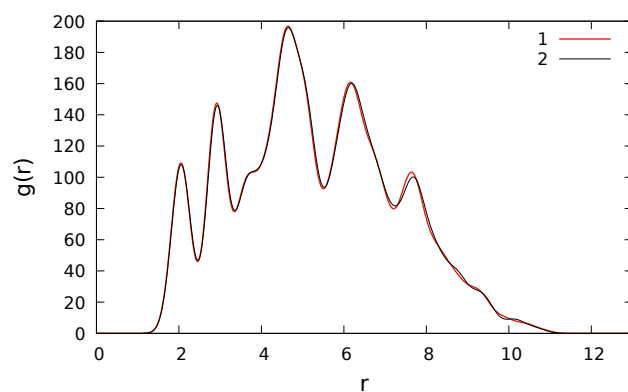

(p)  $(MgO)_{27}$

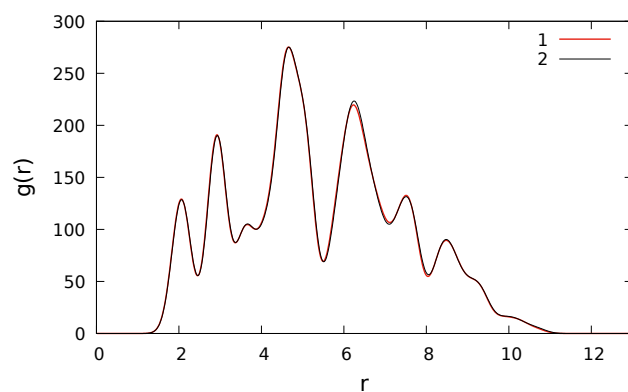

(q)  $(MgO)_{30}$

Figure 9: Comparison of the Radial Distribution Functions (RDF) of our ASA generated structures (1) to the DFT optimised coordinates (2) reported by Dixon et al. (optimised at the B3LYP/DZVP level). The similarity between the two clearly proves that our stochastic optimisation process has a high level of accuracy and that the Born-Mayer potential can describe  $(MgO)_n$  clusters to a very good extent.

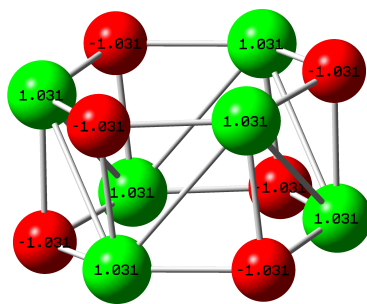

(a)  $(MgO)_6$

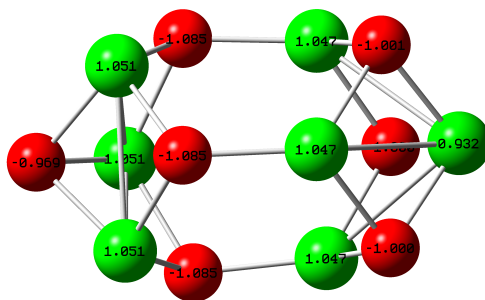

(b)  $(MgO)_7$

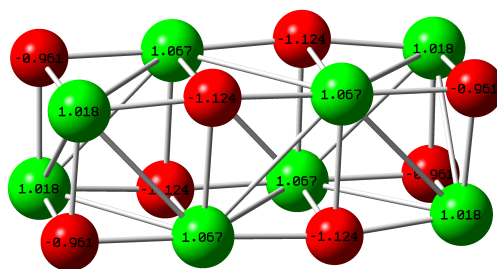

(c)  $(MgO)_8$

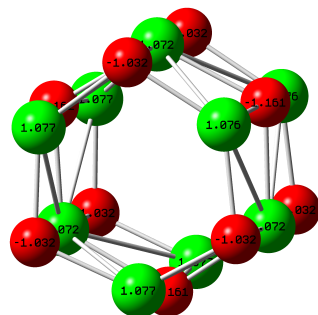

(d)  $(MgO)_9$

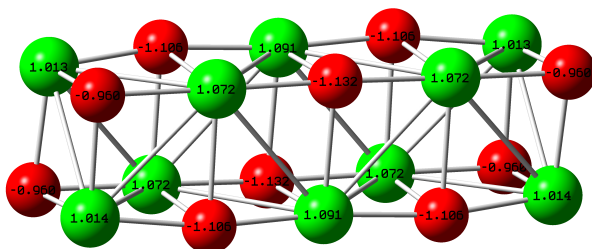

(e)  $(MgO)_{10}$



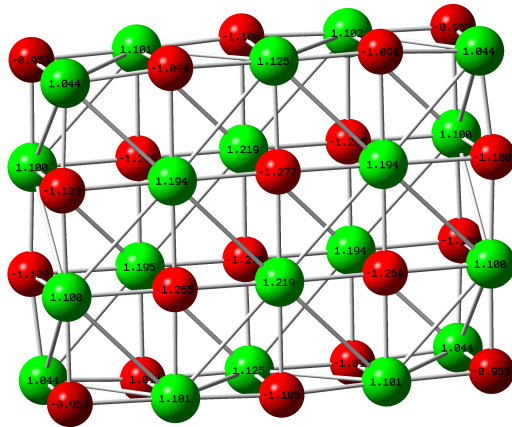

(j)  $(MgO)_{20}$

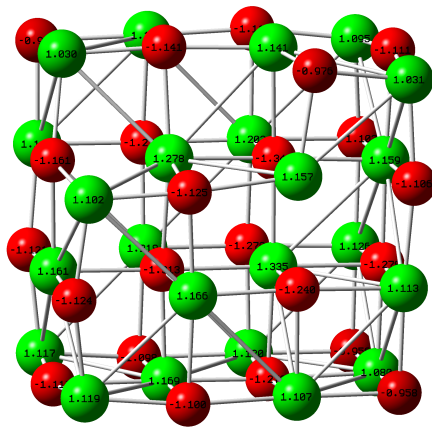

(k)  $(MgO)_{23}$

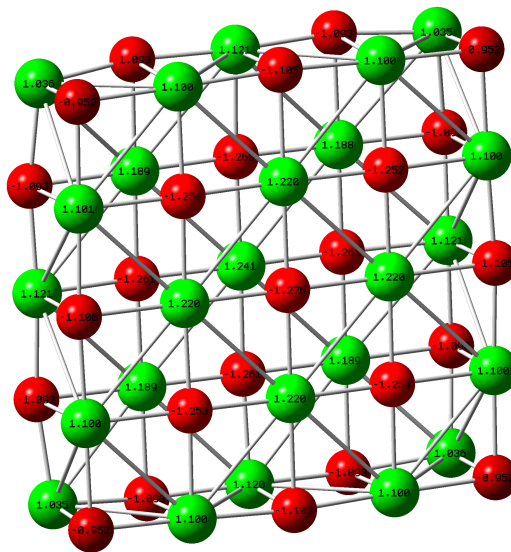

(l)  $(MgO)_{25}$

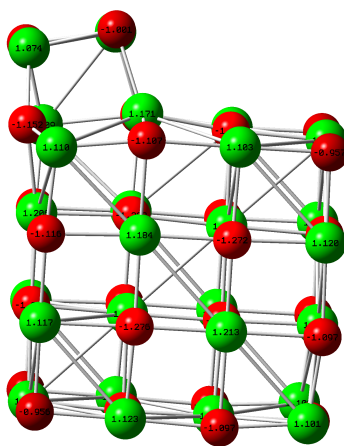

(m)  $(MgO)_{26}$

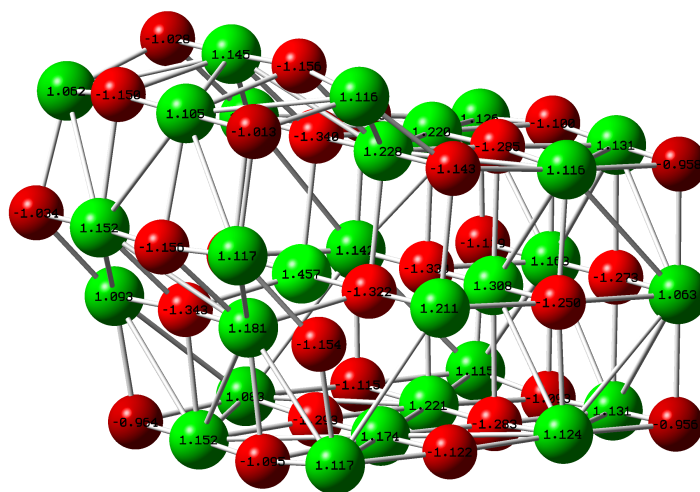

(n)  $(MgO)_{28}$

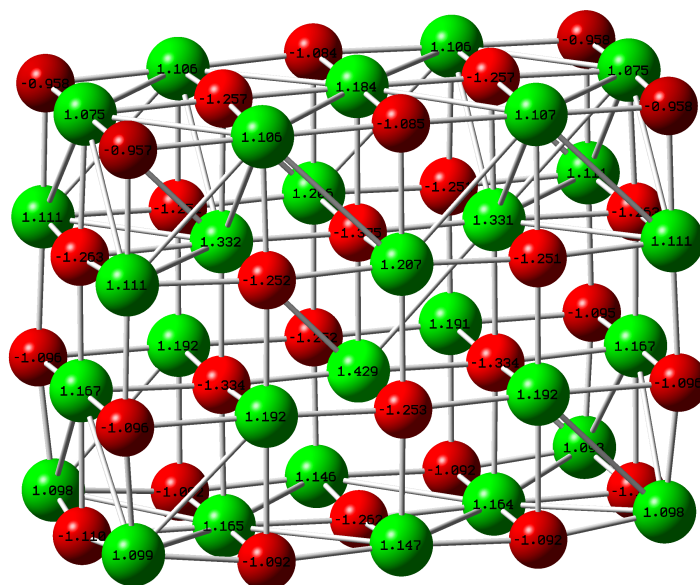

(o)  $(MgO)_{30}$

Figure 10: DFT optimised lowest energy isomers of  $(MgO)_n$  clusters, with exact ionic charges on the atoms

| Cluster<br>Size<br>(n) | Haertelt            | Dixon               | ASA<br>+ DFT<br>(present work) |
|------------------------|---------------------|---------------------|--------------------------------|
| 6                      | -1652.463624        | <b>-1652.463730</b> | -1652.463671                   |
| 7                      | <b>-1927.876613</b> | -1927.876600        | -1927.876592                   |
| 8                      | -2203.357437        | <b>-2203.357456</b> | -2203.352968                   |
| 9                      | -2478.842728        | <b>-2478.842794</b> | -2478.842684                   |
| 10                     | -2754.249106        | <b>-2754.253891</b> | -2754.253890                   |
| 11                     | <b>-3029.719998</b> | -3029.719993        | -3029.711463                   |
| 12                     | -3305.212706        | <b>-3305.220303</b> | -3305.200402                   |
| 13                     | -3580.611263        | <b>-3580.622617</b> | -3580.619697                   |
| 14                     | -3856.079327        | <b>-3856.087799</b> | -3856.085647                   |
| 15                     | -4131.597204        | <b>-4131.597453</b> | -4131.577035                   |
| 16                     | -4407.046163        | -4407.051660        | <b>-4407.051704</b>            |
| 17                     | NA                  | <b>-4682.482874</b> | -4682.475921                   |
| 18                     | NA                  | <b>-4957.986593</b> | -4957.986534                   |
| 19                     | NA                  | <b>-5233.400400</b> | -5233.391358                   |
| 20                     | NA                  | -5508.904240        | <b>-5508.904243</b>            |
| 21                     | NA                  | <b>-5784.351313</b> | -5784.328743                   |
| 22                     | NA                  | <b>-6059.824604</b> | -6059.824603                   |
| 23                     | NA                  | <b>-6335.273781</b> | -6335.264719                   |
| 24                     | NA                  | -6610.817547        | <b>-6610.817556</b>            |
| 25                     | NA                  | <b>-6886.232592</b> | -6886.232485                   |
| 26                     | NA                  | -7161.660806        | <b>-7161.665915</b>            |
| 27                     | NA                  | <b>-7437.177696</b> | -7437.177407                   |
| 28                     | NA                  | -7712.638850        | <b>-7712.650118</b>            |
| 29                     | NA                  | -7988.052041        | <b>-7988.078431</b>            |
| 30                     | NA                  | -8263.632594        | <b>-8263.632598</b>            |

Table 8: Energies (in Hartree) of the global minima of  $(MgO)_n$  clusters as obtained in different works (re-optimised at the B3LYP/DGTZVP level of theory)



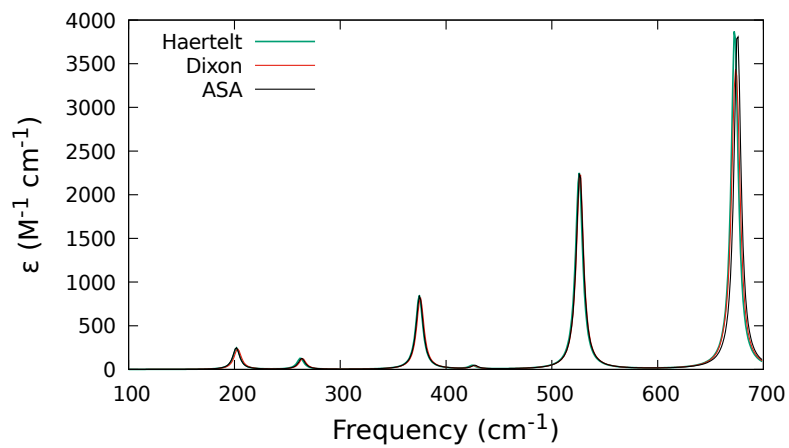

(a)  $(MgO)_6$

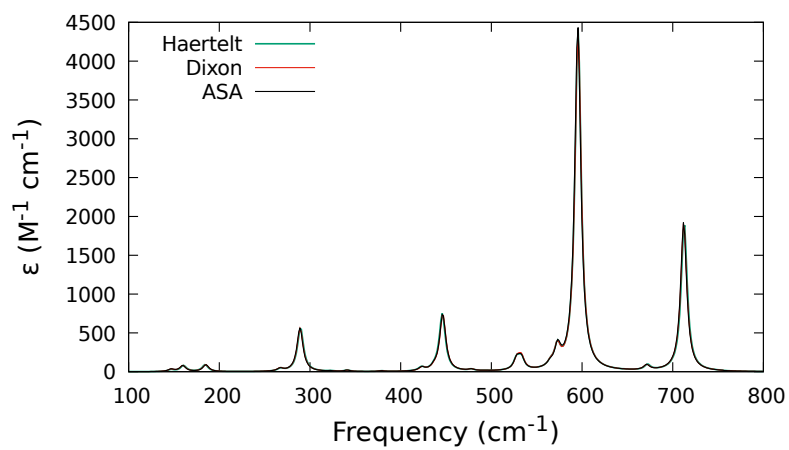

(b)  $(MgO)_7$

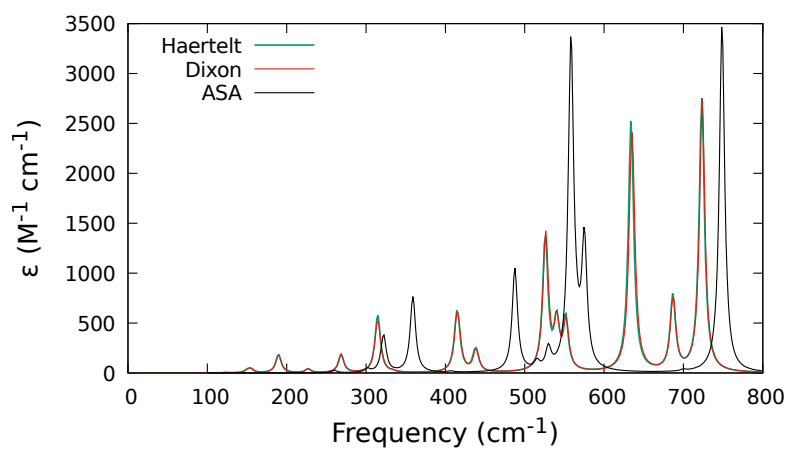

(c)  $(MgO)_8$

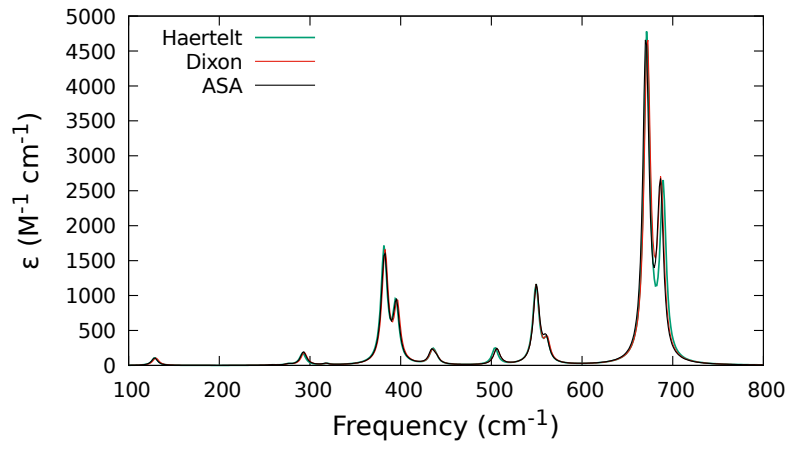

(d)  $(MgO)_9$

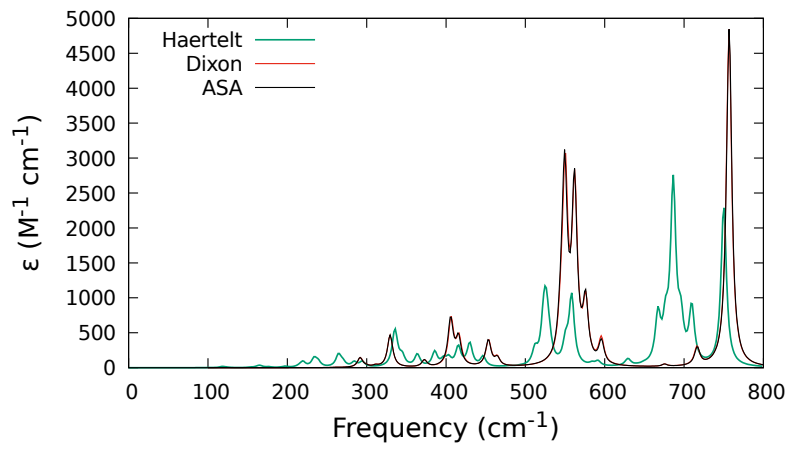

(e)  $(MgO)_{10}$

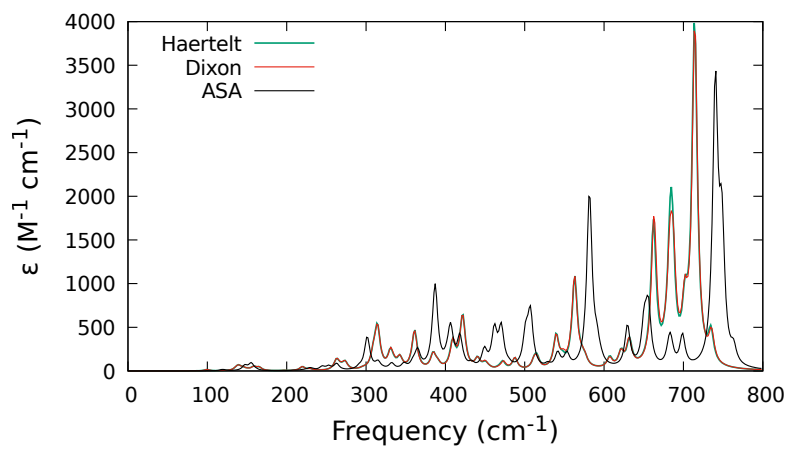

(f)  $(MgO)_{11}$

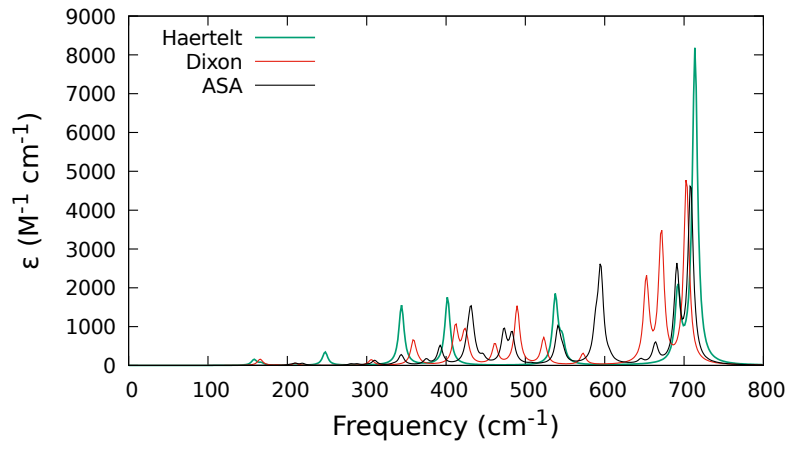

(g)  $(MgO)_{12}$

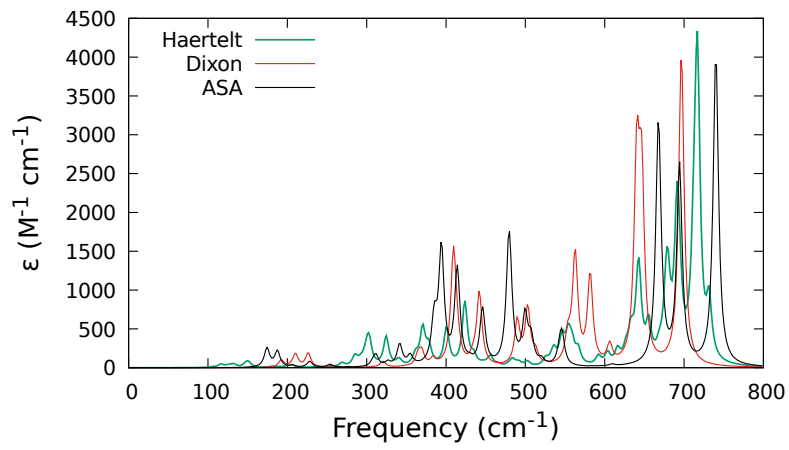

(h)  $(MgO)_{13}$

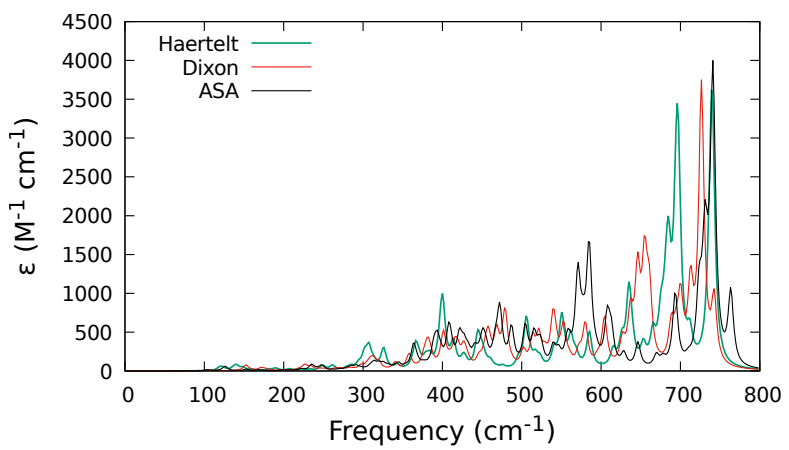

(i)  $(MgO)_{14}$

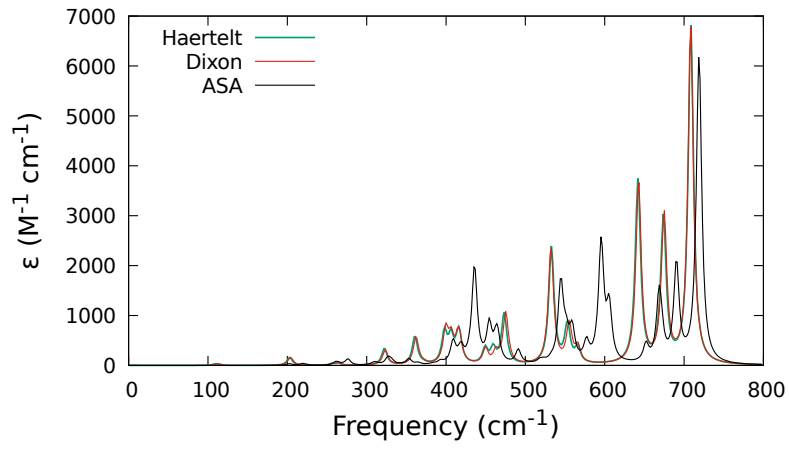

(j)  $(MgO)_{15}$

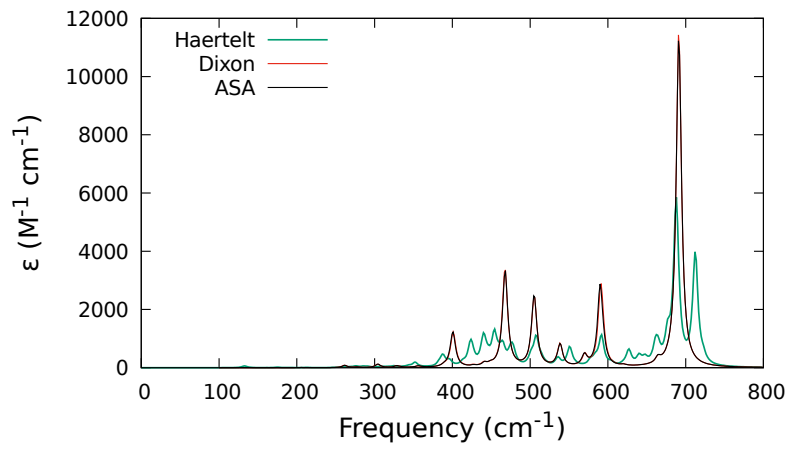

(k)  $(MgO)_{16}$

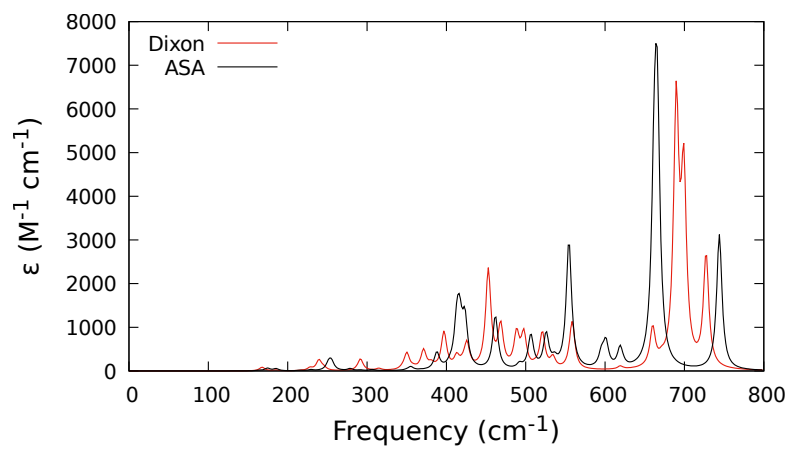

(l)  $(MgO)_{17}$

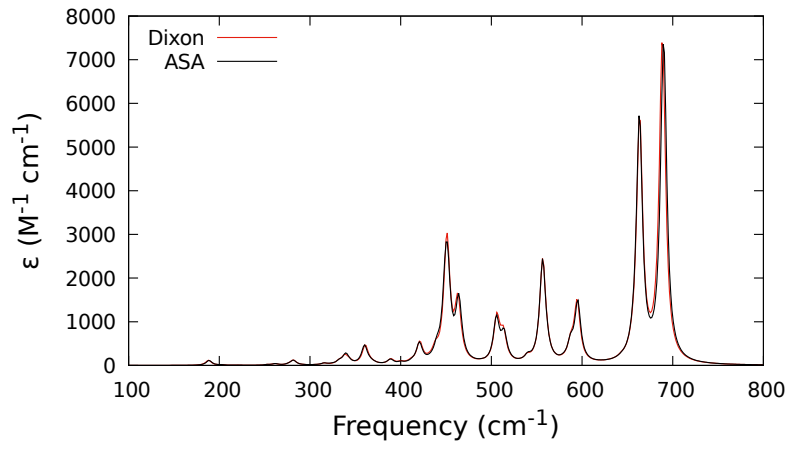

(m)  $(MgO)_{18}$

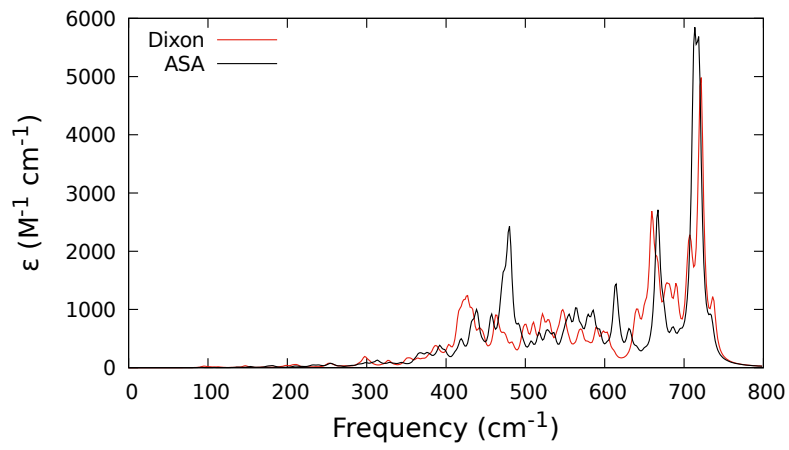

(n)  $(MgO)_{19}$

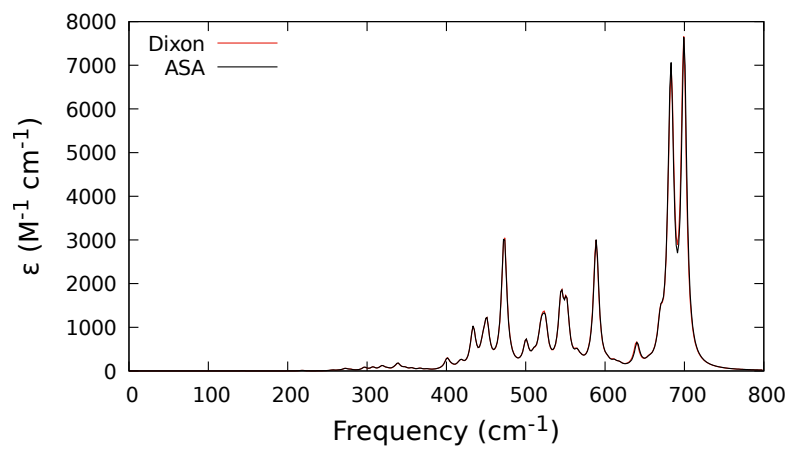

(o)  $(MgO)_{20}$

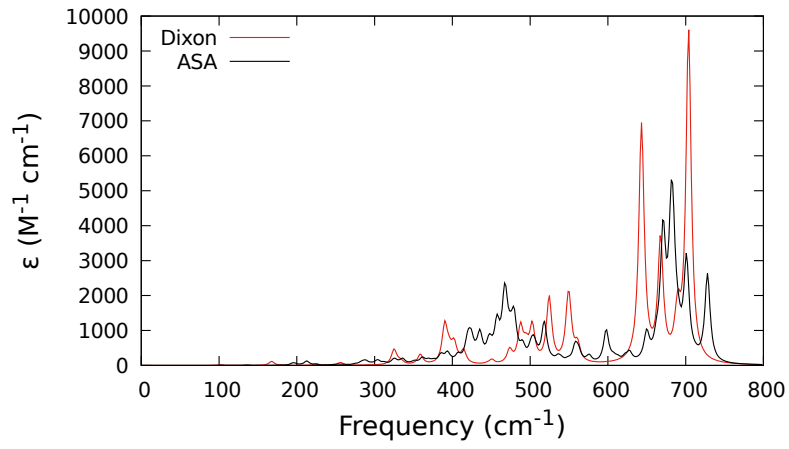

(p)  $(MgO)_{21}$

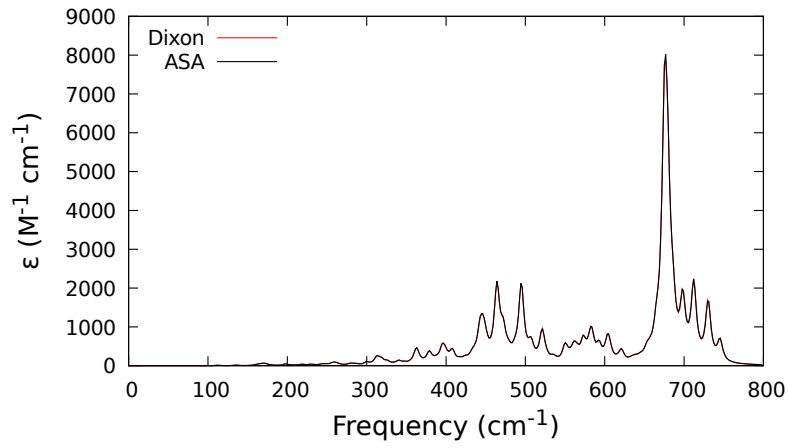

(q)  $(MgO)_{22}$

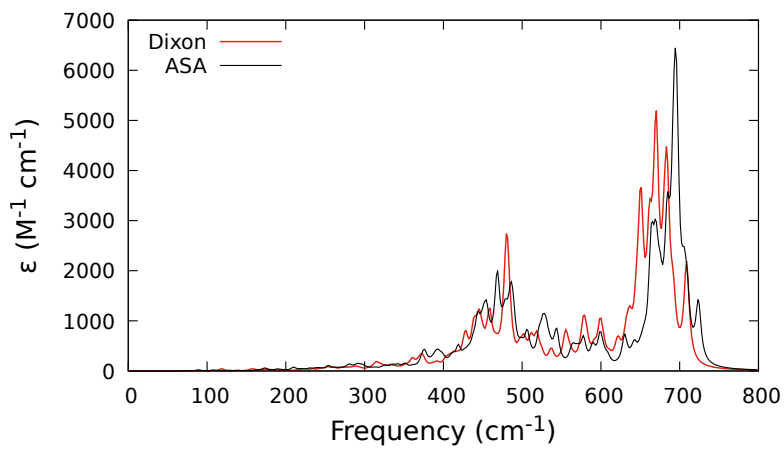

(r)  $(MgO)_{23}$

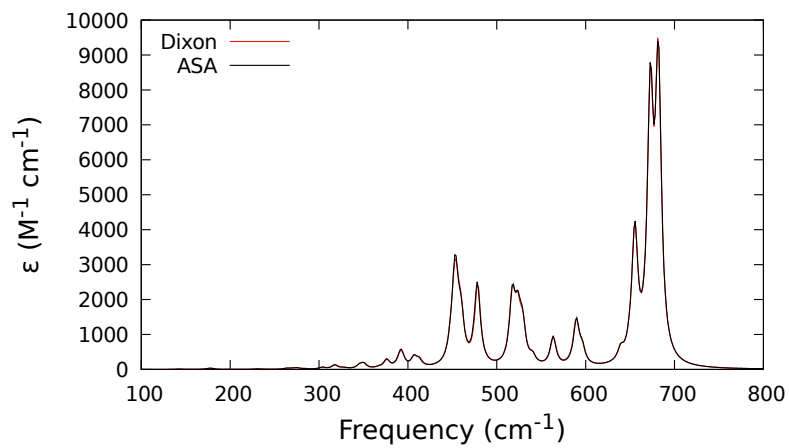

(s)  $(MgO)_{24}$

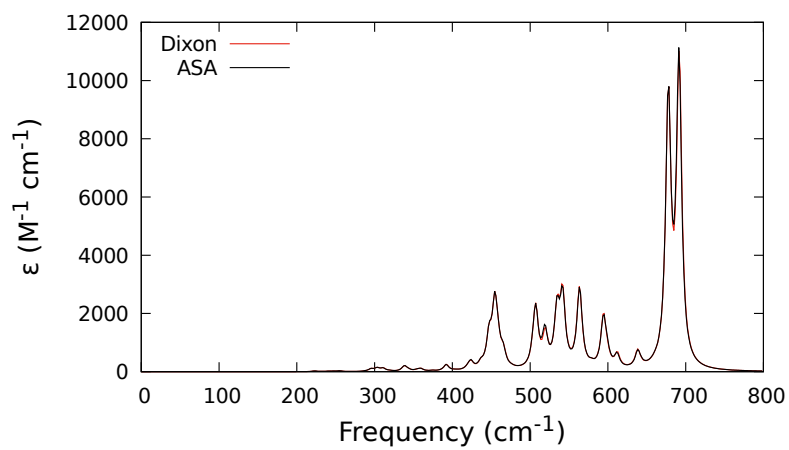

(t)  $(MgO)_{25}$

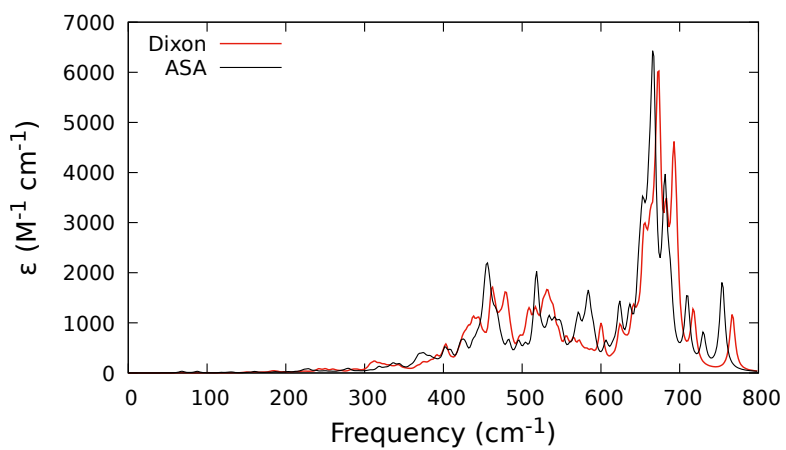

(u)  $(MgO)_{26}$

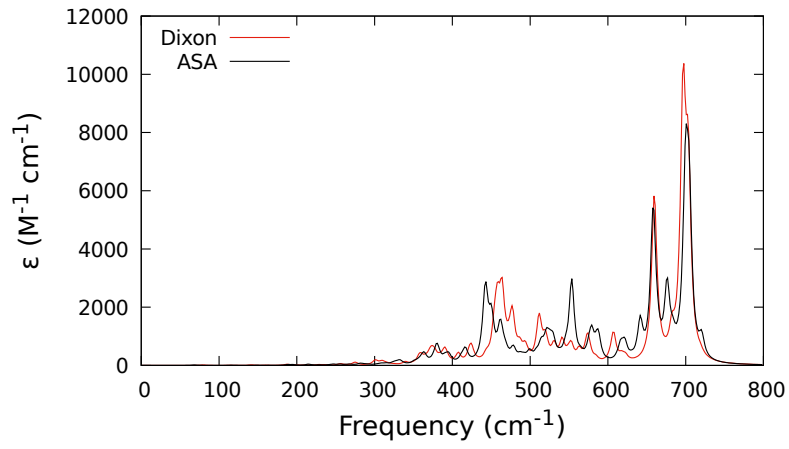

(v)  $(MgO)_{27}$

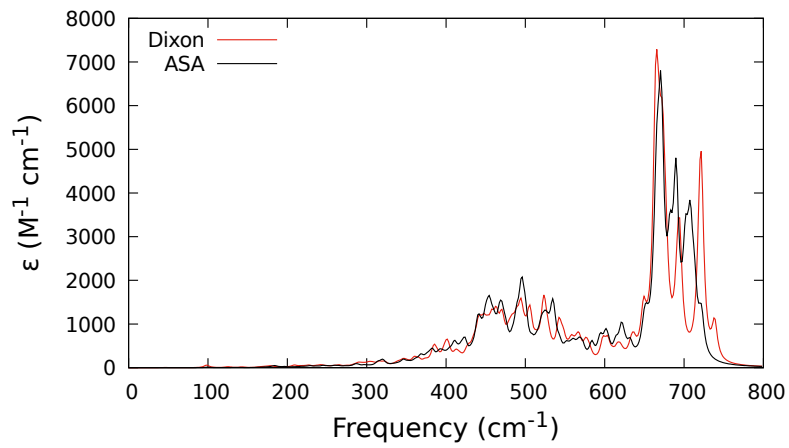

(w)  $(MgO)_{28}$

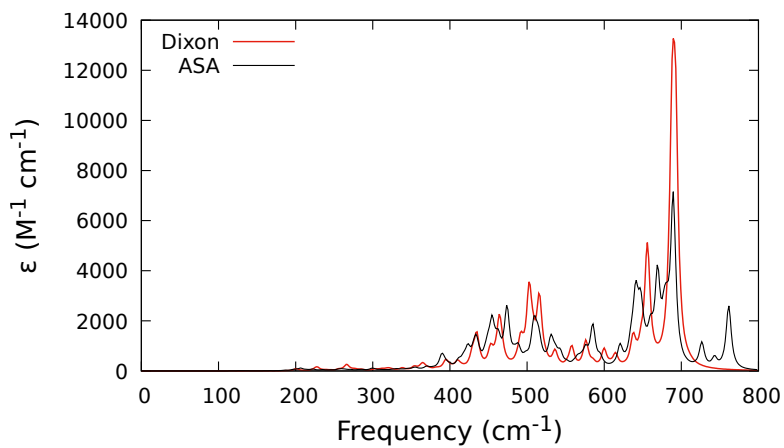

(x)  $(MgO)_{29}$



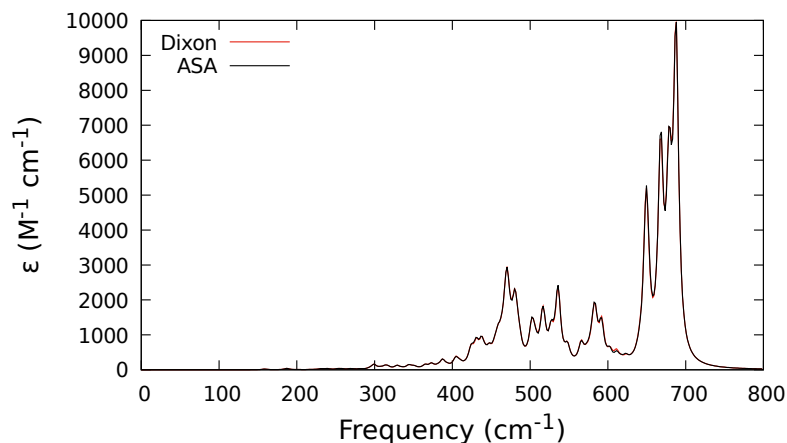

(y)  $(MgO)_{30}$

Figure 11: Comparison of the IR spectra of the global minima of  $(MgO)_n$  clusters obtained by Haertelt et al., Dixon et al. and the present work using ASA, followed by DFT optimisation.

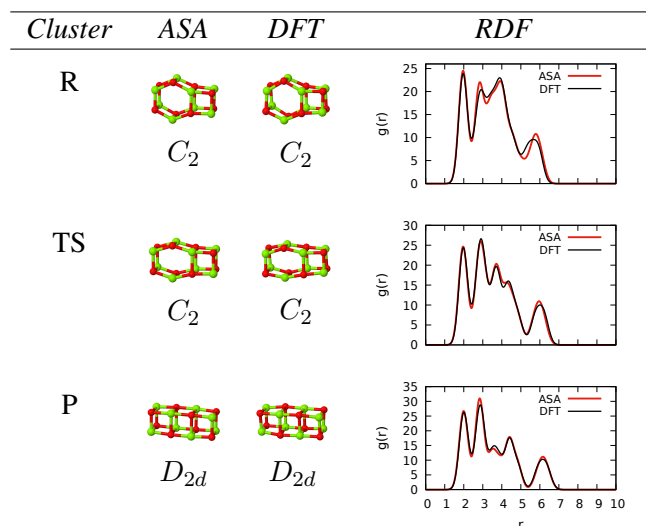

Figure 12: Comparison of ASA and DFT optimised structures for  $(MgO)_8$  cluster

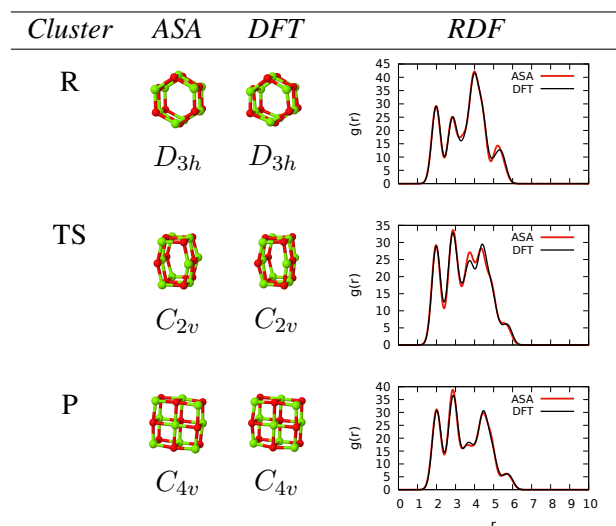

Figure 13: Comparison of ASA and DFT optimised structures for  $(MgO)_9$  cluster

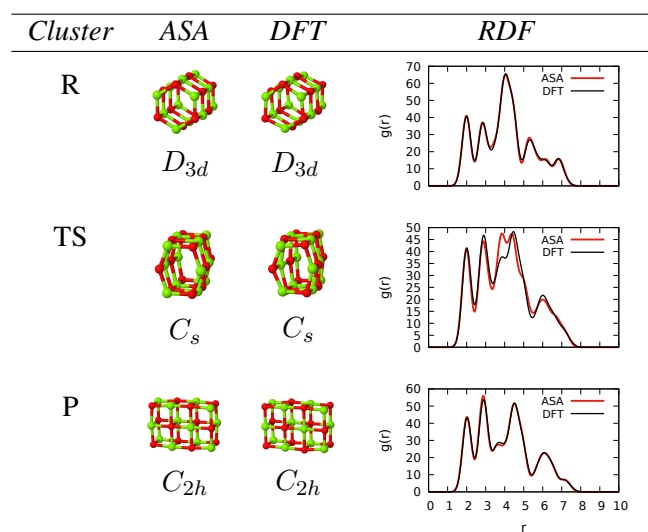

Figure 14: Comparison of ASA and DFT optimised structures for  $(MgO)_{12}$  cluster

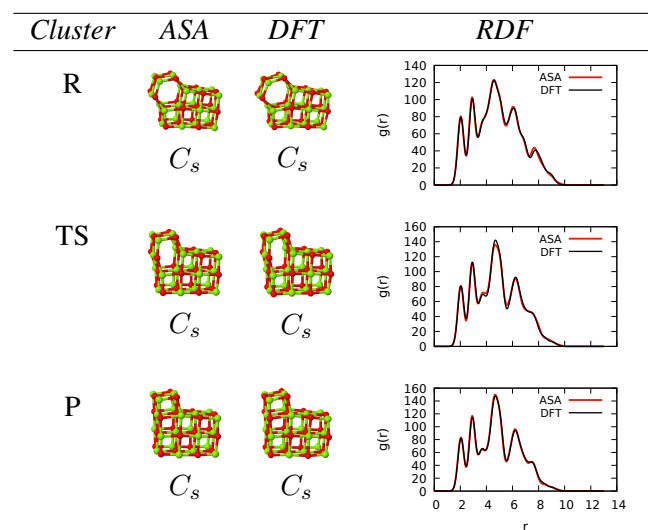

Figure 15: Comparison of ASA and DFT optimised structures for  $(MgO)_{21}$  cluster
